# Supplementary material for: Population genomics and the evolution of virulence in the fungal pathogen Cryptococcus neoformans
Source: PubMed Central journal article supplement (PMC5495072; doi:10.1101/gr.218727.116), 2017-07
Supplement: supp_gr.218727.116_Supplemental_Fig_S1.pdf [file supp_gr.218727.116_Supplemental_Fig_S1.pdf]

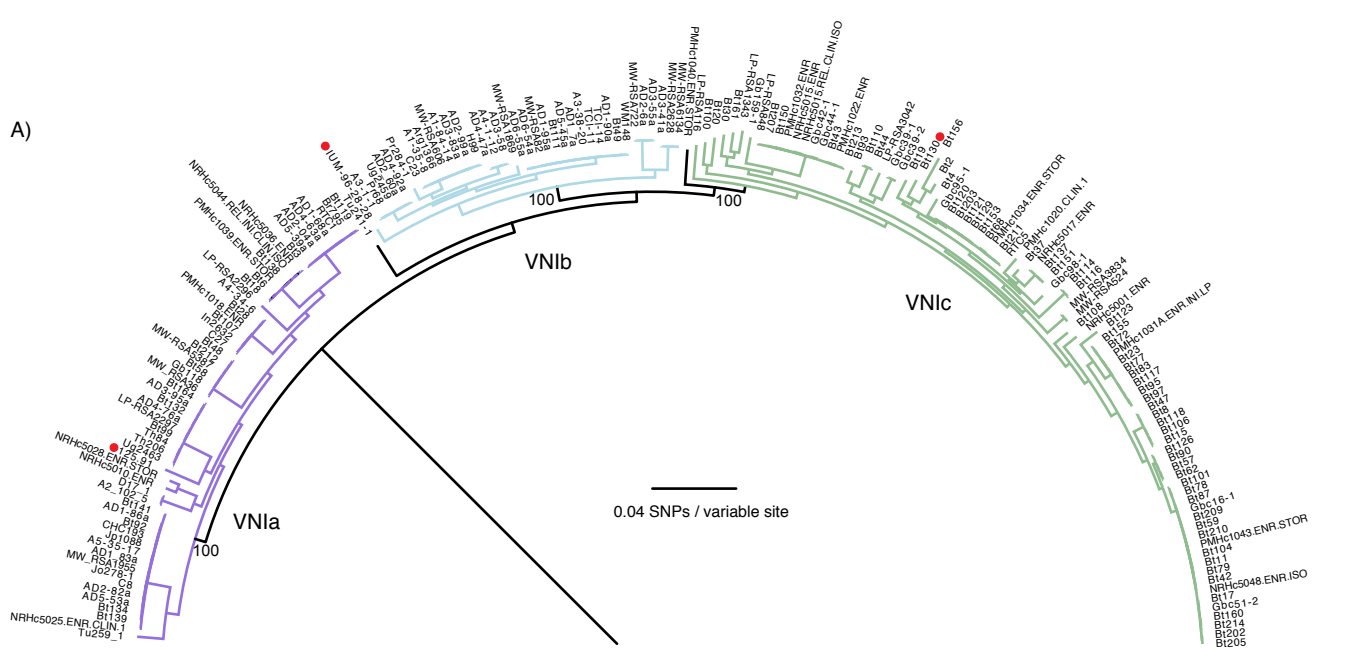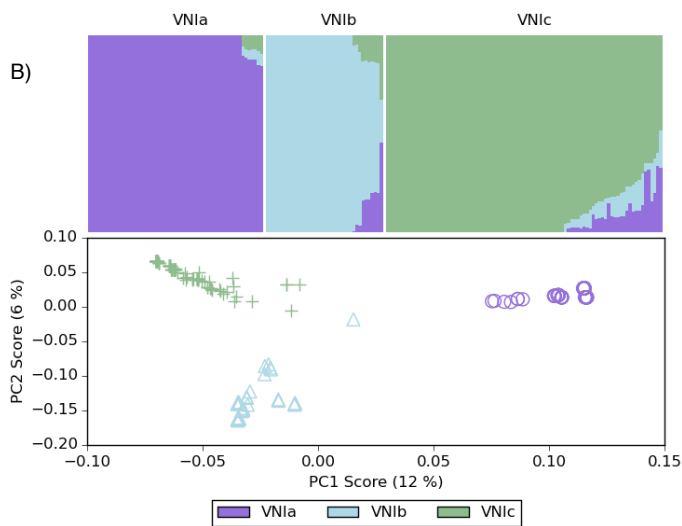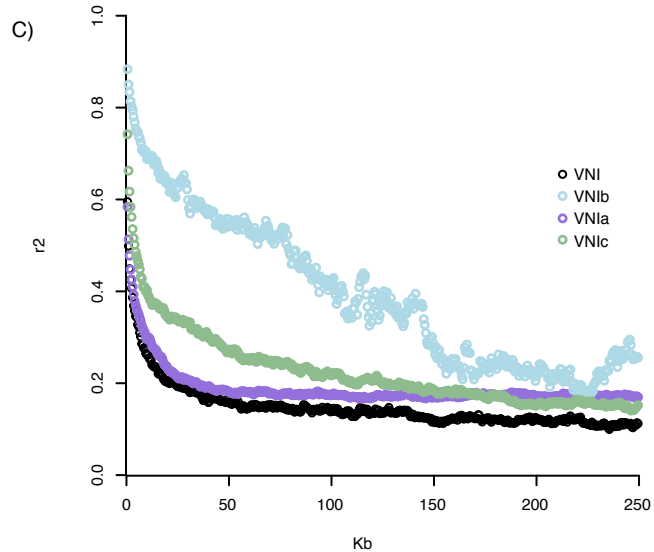

**Supplemental Fig S1.** VNI is comprised of three recombining sub-clades. A) Phylogenetic analysis divides VNI into three major sub-clades, the global VNia and VNib, and the southeast African VNic; B) STRUCTURE and PCA analysis show largely distinct sub-populations with a small degree of mixing; C) Linkage decays more rapidly in the combined VNI dataset than any individual sub-clade, suggesting the sub-clades are currently recombining with each other and do not represent reproductively isolated populations.
