# Supplementary material for: Population genomics and the evolution of virulence in the fungal pathogen Cryptococcus neoformans
Source: PubMed Central journal article supplement (PMC5495072; doi:10.1101/gr.218727.116), 2017-07
Supplement: supp_gr.218727.116_Supplemental_Fig_S3.pdf [file supp_gr.218727.116_Supplemental_Fig_S3.pdf]

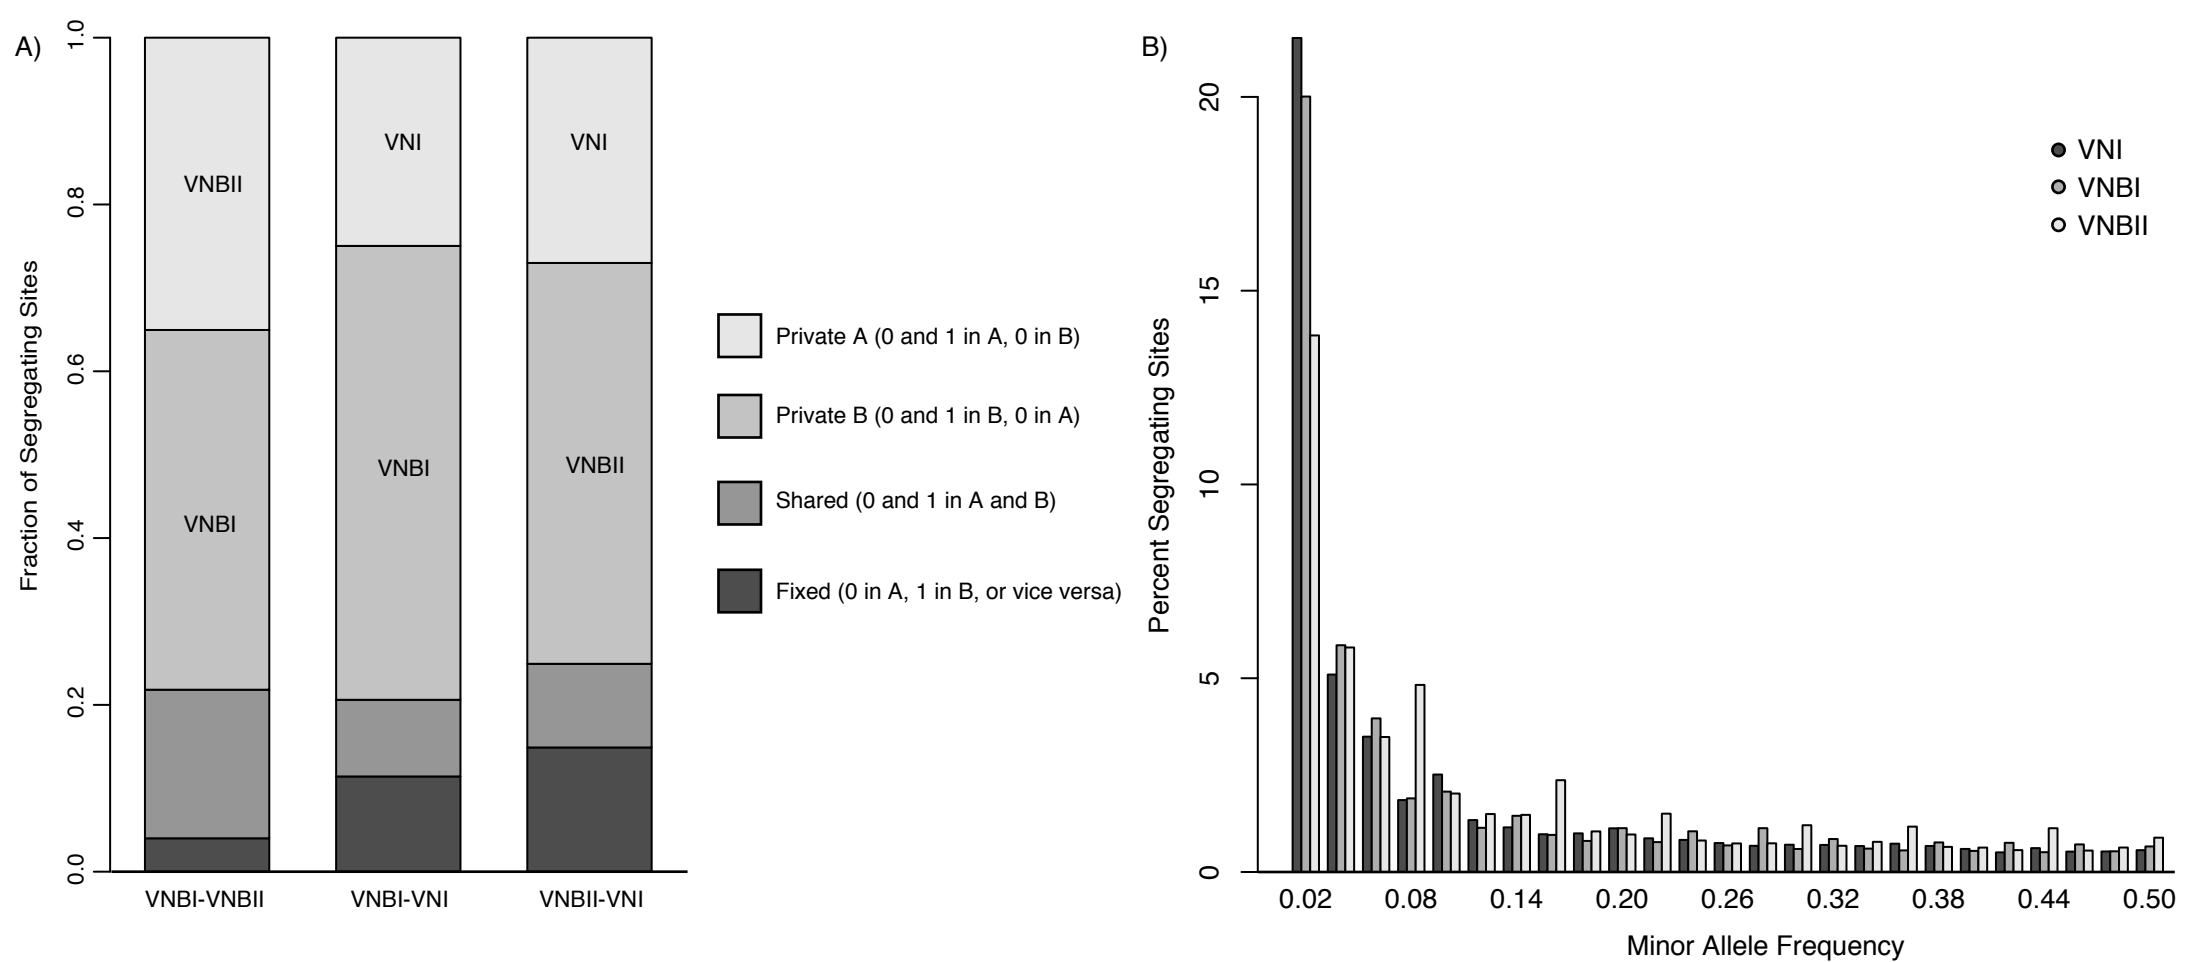

**Supplemental Fig S3.** Analysis of allele frequencies identified an excess of shared alleles between and private alleles within VNBI and VNBII, and an excess of rare alleles in VNI and VNBI. A) Two-way population comparisons of shared and fixed alleles between populations, and private alleles within each population of VNI, VNBI, and VNBII; B) Minor allele frequency in each of the VNI, VNBI and VNBII. VNI and VNBI had significantly more alleles than VNBII ( $p < 2.2 \times 10^{-16}$  for both comparisons, Fisher's exact test).
