# Supplementary material for: Population genomics and the evolution of virulence in the fungal pathogen Cryptococcus neoformans
Source: PubMed Central journal article supplement (PMC5495072; doi:10.1101/gr.218727.116), 2017-07
Supplement: supp_gr.218727.116_Supplemental_Fig_S4.pdf [file supp_gr.218727.116_Supplemental_Fig_S4.pdf]

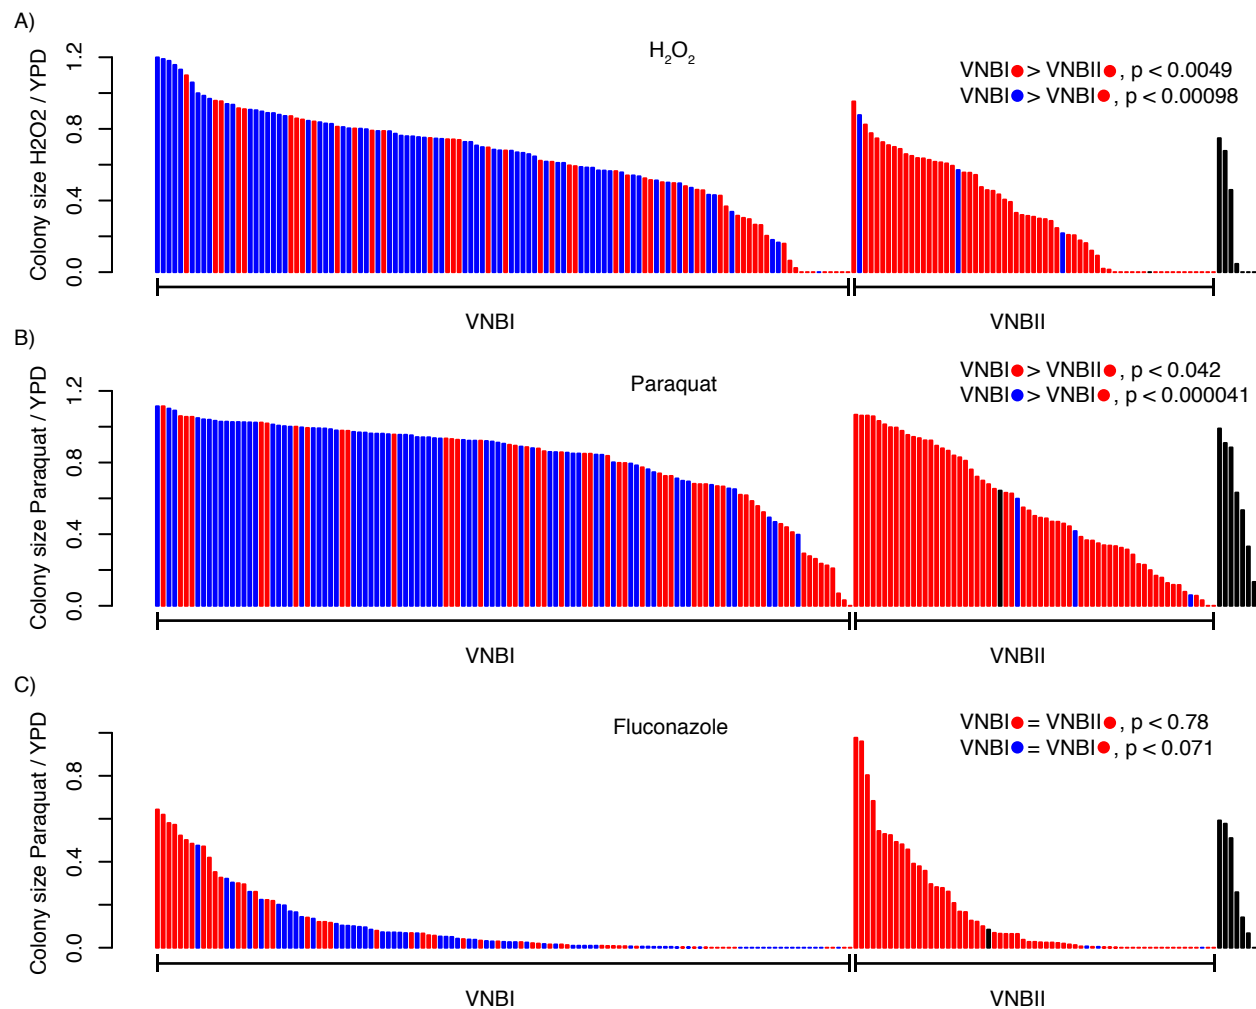

**Supplemental Fig S4.** Phenotypic analysis demonstrates that VNBI isolates are more resistant to oxidative stress than VNBI isolates. Isolates were challenged against two oxidative stressors ( $H_2O_2$  and paraquat) and the antifungal fluconazole. Data is plotted as median colony size on the stressor over median colony size on YPD. Clinical isolates are shown in red, environmental isolates are shown in blue, and control strains are shown in black, and statistical comparisons are shown in the upper right of each plot. A) VNBI isolates were significantly more resistant to  $H_2O_2$  than VNBI isolates, and VNBI environmental isolates were significantly more resistant to  $H_2O_2$  than VNBI clinical isolates. B) VNBI isolates were significantly more resistant to paraquat than VNBI isolates, and VNBI environmental isolates were significantly more resistant to paraquat than VNBI clinical isolates. C) VNBI isolates had similar resistance to fluconazole as VNBI isolates, and VNBI clinical isolates had similar resistance to fluconazole as VNBI environmental isolates.
