# Supplementary material for: Population genomics and the evolution of virulence in the fungal pathogen Cryptococcus neoformans
Source: PubMed Central journal article supplement (PMC5495072; doi:10.1101/gr.218727.116), 2017-07
Supplement: supp_gr.218727.116_Supplemental_Fig_S5.pdf [file supp_gr.218727.116_Supplemental_Fig_S5.pdf]

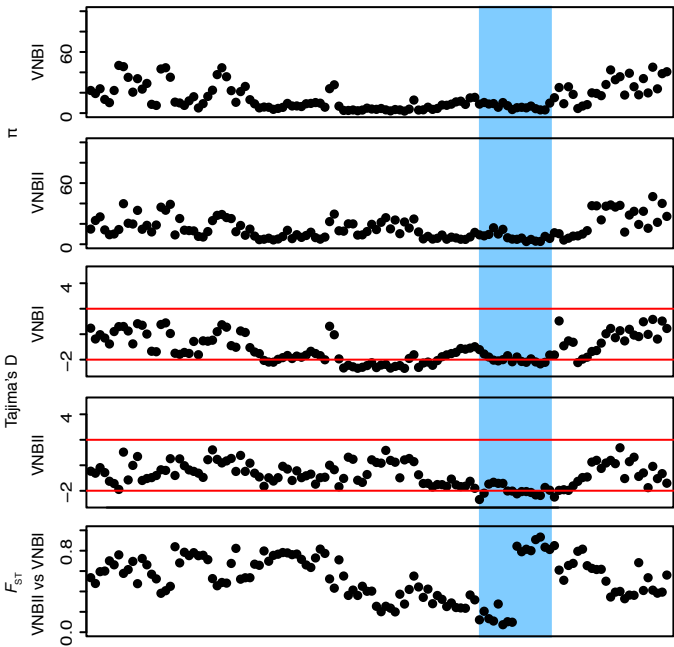

**low  $F_{ST}$**   
 CNAG\_07742 phosphatidylglycerol transfer protein  
 CNAG\_07743 hypothetical protein  
 CNAG\_01065 hypothetical protein  
 CNAG\_01064 hypothetical protein  
 CNAG\_01063 TOR protein KOG1

**high  $F_{ST}$**   
 CNAG\_01061 S/T protein kinase  
 CNAG\_01060 hypothetical protein  
 CNAG\_01059 vacuolar membrane protein  
 CNAG\_01058 nitric oxide synthase-interacting protein  
 CNAG\_01057 COP9 signalosome complex subunit 2

**in between  $F_{ST}$**   
 CNAG\_01062 CAMK/CAMKL/PASK protein kinase

**Supplemental Fig S5.** Region of chromosome 5 with abrupt change in  $F_{ST}$  between VNBI and VNBI. Genes in the low  $F_{ST}$  region, high  $F_{ST}$  region, and between the two regions are listed. The low  $F_{ST}$  region is the only region in the genome where loss of genetic diversity and a low Tajima's D is accompanied by a reduction in  $F_{ST}$  between two populations.
