# Supplementary material for: Population genomics and the evolution of virulence in the fungal pathogen Cryptococcus neoformans
Source: Genome Res. 2017 Jul;27(7):1207–19. doi: 10.1101/gr.218727.116 (PMC5495072; doi:10.1101/gr.218727.116)
Supplement: Supplemental Material [file supp_gr.218727.116_Supplemental_Table_S1.xlsx]

## Sheet: Supplemental Table S1
Supplemental Table S1. Strains used in this study.
Strain	Group	VNI subdivision	Mating type	Country of origin	Isolation source	Broad Project	SRA Accession	Strain description	In GWAS	Phenotyped
8-1	VNII		α	USA	Clinical	G27153	SRX273085	Litvintseva et al 2011 PLoS One, Litvintseva et al 2006 Genetics	No	No
AD3-11a	VNII		α	France	Clinical	G27186	SRX273097	Dromer et al 2007 PLoS Med	No	No
AD3-9a	VNII		α	France	Clinical	G27185	SRX273105	Dromer et al 2007 PLoS Med	No	No
AD5-67a	VNII		α	France	Clinical	G27166	SRX273116	Dromer et al 2007 PLoS Med	No	No
C12	VNII		α	USA	lung/HIV-	G27138	SRX273176	Litvintseva et al 2009 Infect Immun, Litvintseva et al 2006 Genetics	No	No
C2	VNII		α	USA	Clinical	G26125	SRX256039	Litvintseva et al 2006 Genetics	No	No
C45	VNII		α	USA	sputum/HIV-	G18565	SRX189611	Litvintseva et al 2009 Infect Immun, Litvintseva et al 2006 Genetics	No	No
LP-RSA1684	VNII		α	S. Africa	Clinical	G26061	SRX256550, SRX256537	Litvintseva et al 2011 PLoS One	No	No
MW-RSA1327	VNII		α	S. Africa	Clinical	G29897	SRX400063, SRX400064	Van Wyk et al 2014 J. Clin. Microbiol.	No	No
MW-RSA3956	VNII		α	S. Africa	Clinical	G29898	SRX400068, SRX400067	Van Wyk et al 2014 J. Clin. Microbiol.	No	No
MW-RSA4119	VNII		α	S. Africa	Clinical	G26040	SRX255633, SRX256474	Van Wyk et al 2014 J. Clin. Microbiol.	No	No
MW-RSA852	VNII		α	S. Africa	Clinical	G18572	SRX189631, SRX256488, SRX219293	Van Wyk et al 2014 J. Clin. Microbiol.	No	No
PMHc1023.ENR	VNII		α	Botswana	Clinical	G84290	SRR1926004, SRR1926050, SRR1944812	Chen et. al 2015 Mol. Ecol.	No	No
T4	VNII		α	USA	oak tree	G26062	SRX256361, SRX256495	This study	No	No
Ug2462	VNII		α	Uganda	Clinical	G27157	SRX273266	Litvintseva et al 2006 Genetics	No	No
WM626	VNII		α	Australia	Clinical	G26034	SRX400075, SRX400076	Litvintseva et al 2006 Genetics, Meyer et al 2009 Med Mycol	No	No
Bt102	VNBI		α	Botswana	CSF /HIV+	G26315	SRX255653, SRX272107, SRX256517, SRX345121	Litvintseva et al 2003 Euk. Cell	Yes	Yes
Bt142	VNBI		a	Botswana	CSF /HIV+	G27187	SRX377406, SRX377405	Litvintseva et al 2003 Euk. Cell	Yes	Yes
Bt147	VNBI		α	Botswana	CSF /HIV+	G27175	SRX273157	Litvintseva et al 2003 Euk. Cell	Yes	Yes
Bt148	VNBI		α	Botswana	CSF /HIV+	G27156	SRX273158	Litvintseva et al 2003 Euk. Cell	Yes	Yes
Bt154	VNBI		α	Botswana	CSF /HIV+	G27135	SRX273163	Litvintseva et al 2003 Euk. Cell	Yes	Yes
Bt204	VNBI		a	Botswana	CSF /HIV+	G27193	SRX273168	Litvintseva et al 2003 Euk. Cell, Litvintseva et al 2006 Genetics	Yes	Yes
Bt22	VNBI		α	Botswana	CSF /HIV+	G26308	SRX255940, SRX255942, SRX256376	Litvintseva et al 2003 Euk. Cell	Yes	Yes
Bt24	VNBI		a	Botswana	CSF /HIV+	G26310	SRX256530, SRX256520, SRX256042	Litvintseva et al 2003 Euk. Cell, Litvintseva et al 2006 Genetics	Yes	Yes
Bt45	VNBI		α	Botswana	CSF /HIV+	G26298	SRX256409, SRX255989, SRX255949	Litvintseva et al 2003 Euk. Cell	Yes	Yes
Bt60	VNBI		α	Botswana	CSF /HIV+	G26283	SRX255661, SRX255608, SRX255651	Litvintseva et al 2003 Euk. Cell, Litvintseva et al 2006 Genetics	Yes	Yes
Bt63	VNBI		a	Botswana	CSF /HIV+	G18576	SRX189619, SRX189366, SRX189593	Litvintseva et al 2003 Euk. Cell, Litvintseva et al 2006 Genetics	Yes	Yes
Bt7	VNBI		α	Botswana	CSF /HIV+	G26287	SRX256449, SRX256533, SRX255663	Litvintseva et al 2003 Euk. Cell	Yes	Yes
Bt70	VNBI		a	Botswana	CSF /HIV+	G26290	SRX256415, SRX256490, SRX256505	Litvintseva et al 2003 Euk. Cell	Yes	Yes
Bt85	VNBI		a	Botswana	CSF /HIV+	G18579	SRX189630, SRX189367, SRX189594	Litvintseva et al 2003 Euk. Cell	Yes	Yes
Bt96	VNBI		α	Botswana	CSF /HIV+	G26293	SRX256429, SRX256439, SRX256428	Litvintseva et al 2003 Euk. Cell	Yes	Yes
Ftc102-1	VNBI		a	Botswana	Mopane tree	G84367	SRR1925977, SRR1926007, SRR1943116	Chen et. al 2015 Mol. Ecol.	Yes	Yes
Ftc103-1	VNBI		α	Botswana	Mopane tree	G84368	SRR1925979, SRR1926069, SRR1944751	Chen et. al 2015 Mol. Ecol.	Yes	Yes
Ftc109-1	VNBI		α	Botswana	Mopane tree	G84369	SRR1926026, SRR1942912, SRR1943073	Chen et. al 2015 Mol. Ecol.	Yes	Yes
Ftc111-1	VNBI		a	Botswana	Mopane tree	G84370	SRR1925955, SRR1942993, SRR1944749	Chen et. al 2015 Mol. Ecol.	Yes	Yes
Ftc132-1	VNBI		α	Botswana	Mopane tree	G84212	SRR1925892, SRR1926018, SRR1944836	Chen et. al 2015 Mol. Ecol.	Yes	Yes
Ftc134-3	VNBI		α	Botswana	Mopane tree	G84213	SRR1926061, SRR1943220, SRR1944761, SRR1944776	Chen et. al 2015 Mol. Ecol.	Yes	Yes
Ftc137-1	VNBI		α	Botswana	Mopane tree	G84214	SRR1942921, SRR1942926, SRR1944803	Chen et. al 2015 Mol. Ecol.	Yes	Yes
Ftc146-1	VNBI		α	Botswana	Mopane tree	G84215	SRR1926085, SRR1943160, SRR1944815	Chen et. al 2015 Mol. Ecol.	Yes	Yes
Ftc151-1	VNBI		a	Botswana	Mopane tree	G84216	SRR1926005, SRR1944770, SRR1944788	Chen et. al 2015 Mol. Ecol.	Yes	Yes
Ftc153-1	VNBI		a	Botswana	Mopane tree	G84217	SRR1925978, SRR1931705, SRR1943090	Chen et. al 2015 Mol. Ecol.	Yes	Yes
Ftc158-2	VNBI		a	Botswana	Avian droppings	G84218	SRR1942949, SRR1944870, SRR1944872	Chen et. al 2015 Mol. Ecol.	Yes	Yes
Ftc167-1	VNBI		α	Botswana	Mopane tree	G84220	SRR1942923, SRR1942933, SRR1944840	Chen et. al 2015 Mol. Ecol.	Yes	Yes
Ftc168-1	VNBI		a	Botswana	Mopane tree	G84221	SRR1942972, SRR1944809, SRR1944857	Chen et. al 2015 Mol. Ecol.	Yes	Yes
Ftc170-1	VNBI		a	Botswana	Mopane tree	G84222	SRR1931688, SRR1944700, SRR1944805	Chen et. al 2015 Mol. Ecol.	Yes	Yes
Ftc173-1	VNBI		α	Botswana	Mopane tree	G84223	SRR1925913, SRR1925980, SRR1942885	Chen et. al 2015 Mol. Ecol.	Yes	Yes
Ftc192-1	VNBI		a	Botswana	Mopane tree	G84224	SRR1942932, SRR1944767, SRR1944853	Chen et. al 2015 Mol. Ecol.	Yes	Yes
Ftc195-1	VNBI		α	Botswana	Mopane tree	G84225	SRR1926017, SRR1926058, SRR1926083, SRR1942941	Chen et. al 2015 Mol. Ecol.	Yes	Yes
Ftc200-1	VNBI		α	Botswana	Mopane tree	G84226	SRR1925925, SRR1925997, SRR1943114	Chen et. al 2015 Mol. Ecol.	Yes	Yes
Ftc202-1	VNBI		α	Botswana	Mopane tree	G84227	SRR1925933, SRR1926009, SRR1942977	Chen et. al 2015 Mol. Ecol.	Yes	Yes
Ftc207-1	VNBI		a	Botswana	Mopane tree	G84228	SRR1926006, SRR1926022, SRR1944707	Chen et. al 2015 Mol. Ecol.	Yes	Yes
Ftc209-1	VNBI		α	Botswana	Mopane tree	G84229	SRR1925889, SRR1942904, SRR1944833	Chen et. al 2015 Mol. Ecol.	Yes	Yes
Ftc209-3	VNBI		a	Botswana	Mopane tree	G84230	SRR1926045, SRR1943107, SRR1944826	Chen et. al 2015 Mol. Ecol.	Yes	Yes
Ftc211-1	VNBI		α	Botswana	Mopane tree	G84231	SRR1943061, SRR1943069, SRR1947210	Chen et. al 2015 Mol. Ecol.	Yes	Yes
Ftc214-1	VNBI		α	Botswana	Mopane tree	G84232	SRR1942937, SRR1944820, SRR1944860	Chen et. al 2015 Mol. Ecol.	Yes	Yes
Ftc217-1	VNBI		α	Botswana	Mopane tree	G84233	SRR1942905, SRR1944752, SRR1944801	Chen et. al 2015 Mol. Ecol.	Yes	Yes
Ftc222-2	VNBI		α	Botswana	Mopane tree	G84234	SRR1942945, SRR1944824, SRR1944827	Chen et. al 2015 Mol. Ecol.	Yes	Yes
Ftc225-1	VNBI		α	Botswana	Mopane tree	G84235	SRR1942884, SRR1944748, SRR1944850	Chen et. al 2015 Mol. Ecol.	Yes	Yes
Ftc225-3	VNBI		a	Botswana	Mopane tree	G84236	SRR1931725, SRR1944699, SRR1944866	Chen et. al 2015 Mol. Ecol.	Yes	Yes
Ftc236-1	VNBI		α	Botswana	Mopane tree	G84237	SRR1926019, SRR1944726, SRR1944779	Chen et. al 2015 Mol. Ecol.	Yes	Yes
Ftc239-1	VNBI		α	Botswana	Mopane tree	G84238	SRR1926034, SRR1931691, SRR1942979, SRR1944785	Chen et. al 2015 Mol. Ecol.	Yes	Yes
Ftc239-2	VNBI		a	Botswana	Mopane tree	G84239	SRR1943111, SRR1926068, SRR1944783, SRR1944814	Chen et. al 2015 Mol. Ecol.	Yes	Yes
Ftc241-1	VNBI		a	Botswana	Mopane tree	G84240	SRR1926010, SRR1931694, SRR1944712, SRR1944854	Chen et. al 2015 Mol. Ecol.	Yes	Yes
Ftc257-1	VNBI		α	Botswana	Mopane tree	G84241	SRR1926052, SRR1942936, SRR1944847, SRR1944868	Chen et. al 2015 Mol. Ecol.	Yes	Yes
Ftc267-1	VNBI		α	Botswana	Mopane tree	G84243	SRR1925895, SRR1925989, SRR1944799	Chen et. al 2015 Mol. Ecol.	Yes	Yes
Ftc267-2	VNBI		α	Botswana	Mopane tree	G84244	SRR1926024, SRR1944739, SRR1944743	Chen et. al 2015 Mol. Ecol.	Yes	Yes
Ftc321-1	VNBI		α	Botswana	Mopane tree	G84245	SRR1925917, SRR1943015, SRR1944716	Chen et. al 2015 Mol. Ecol.	Yes	Yes
Ftc321-2	VNBI		α	Botswana	Mopane tree	G84246	SRR1926031, SRR1944790, SRR1944829	Chen et. al 2015 Mol. Ecol.	Yes	Yes
Ftc321-3	VNBI		a	Botswana	Mopane tree	G84247	SRR1931687, SRR1944688, SRR1944810	Chen et. al 2015 Mol. Ecol.	Yes	Yes
Ftc327-1	VNBI		α	Botswana	Mopane tree	G84248	SRR1926081, SRR1944725, SRR1944732	Chen et. al 2015 Mol. Ecol.	Yes	Yes
Ftc555-1	VNBI		a	Botswana	Mopane tree	G84272	SRR1925884, SRR1926001, SRR1943020	Chen et. al 2015 Mol. Ecol.	Yes	Yes
Ftc555-2	VNBI		α	Botswana	Mopane tree	G84273	SRR1926087, SRR1926088, SRR1944804	Chen et. al 2015 Mol. Ecol.	Yes	Yes
Gbc573-1	VNBI		α	Botswana	Unknown tree	G84274	SRR1931690, SRR1931723, SRR1944715	Chen et. al 2015 Mol. Ecol.	Yes	Yes
LP-RSA6618	VNBI		α	Botswana	Clinical	G27125	SRX273182	Litvintseva et al 2011 PLoS One	Yes	Yes
LP-RSA756	VNBI		α	Botswana	Clinical	G27137	SRX273185	Litvintseva et al 2011 PLoS One	Yes	Yes
Muc364-1	VNBI		α	Botswana	Mopane tree	G84249	SRR1925996, SRR1926000, SRR1943115, SRR1944735	Chen et. al 2015 Mol. Ecol.	Yes	Yes
Muc367-1	VNBI		α	Botswana	Mopane tree	G84250	SRR1942965, SRR1944834, SRR1944838	Chen et. al 2015 Mol. Ecol.	Yes	Yes
Muc402-1	VNBI		α	Botswana	Mopane tree	G84253	SRR1926037, SRR1942947, SRR1944731	Chen et. al 2015 Mol. Ecol.	Yes	Yes
Muc416-4	VNBI		α	Botswana	Mopane tree	G84254	SRR1925995, SRR1926021, SRR1931715	Chen et. al 2015 Mol. Ecol.	Yes	Yes
Muc418-1	VNBI		α	Botswana	Mopane tree	G84255	SRR1942918, SRR1942928, SRR1944745	Chen et. al 2015 Mol. Ecol.	Yes	Yes
Muc437-1	VNBI		α	Botswana	Mopane tree	G84256	SRR1926086, SRR1943063, SRR1944729	Chen et. al 2015 Mol. Ecol.	Yes	Yes
Muc449-1	VNBI		α	Botswana	Mopane tree	G84257	SRR1942975, SRR1943017, SRR1944839	Chen et. al 2015 Mol. Ecol.	Yes	Yes
Muc451-1	VNBI		α	Botswana	Mopane tree	G84258	SRR1925926, SRR1926016, SRR1944806	Chen et. al 2015 Mol. Ecol.	Yes	Yes
Muc457-1	VNBI		α	Botswana	Mopane tree	G84259	SRR1925976, SRR1926078, SRR1944796	Chen et. al 2015 Mol. Ecol.	Yes	Yes
Muc458-2	VNBI		α	Botswana	Mopane tree	G84260	SRR1925924, SRR1926053, SRR1943057	Chen et. al 2015 Mol. Ecol.	Yes	Yes
Muc460-3	VNBI		α	Botswana	Mopane tree	G84261	SRR1931716, SRR1944687, SRR1944701	Chen et. al 2015 Mol. Ecol.	Yes	Yes
Muc463-2	VNBI		α	Botswana	Mopane tree	G84262	SRR1925916, SRR1925981, SRR1943009	Chen et. al 2015 Mol. Ecol.	Yes	No
Muc466-1	VNBI		α	Botswana	Mopane tree	G84263	SRR1925910, SRR1925936, SRR1944746	Chen et. al 2015 Mol. Ecol.	Yes	Yes
Muc466-3	VNBI		α	Botswana	Mopane tree	G84264	SRR1925982, SRR1943108, SRR1944765	Chen et. al 2015 Mol. Ecol.	Yes	Yes
Muc479-1	VNBI		α	Botswana	Mopane tree	G84265	SRR1926089, SRR1944710, SRR1944771	Chen et. al 2015 Mol. Ecol.	Yes	Yes
Muc489-1	VNBI		α	Botswana	Mopane tree	G84266	SRR1925954, SRR1926003, SRR1944753	Chen et. al 2015 Mol. Ecol.	Yes	Yes
Muc498-2	VNBI		a	Botswana	Mopane tree	G84267	SRR1943023, SRR1947215, SRR1947216	Chen et. al 2015 Mol. Ecol.	Yes	Yes
Muc503-1	VNBI		α	Botswana	Mopane tree	G84268	SRR1925887, SRR1943127, SRR1944792	Chen et. al 2015 Mol. Ecol.	Yes	Yes
Muc504-1	VNBI		α	Botswana	Mopane tree	G84269	SRR1925937, SRR1926030, SRR1944766	Chen et. al 2015 Mol. Ecol.	Yes	Yes
Muc516-1	VNBI		α	Botswana	Mopane tree	G84270	SRR1942915, SRR1944821, SRR1944859	Chen et. al 2015 Mol. Ecol.	Yes	Yes
Muc525-1	VNBI		α	Botswana	Soil	G84271	SRR1942997, SRR1942998, SRR1947213	Chen et. al 2015 Mol. Ecol.	Yes	Yes
NRHc5004.ENR	VNBI		a	Botswana	Clinical	G84315	SRR1931703, SRR1944823, SRR1944843	Chen et. al 2015 Mol. Ecol.	Yes	Yes
NRHc5005.ENR	VNBI		α	Botswana	Clinical	G84316	SRR1925990, SRR1926071, SRR1944719	Chen et. al 2015 Mol. Ecol.	Yes	Yes
NRHc5009.ENR	VNBI		not assigned	Botswana	Clinical	G84319	SRR1942916, SRR1944754, SRR1944763	Chen et. al 2015 Mol. Ecol.	Yes	Yes
NRHc5009.REL.INI	VNBI		α	Botswana	Clinical	G84320	SRR1942901, SRR1942919, SRR1944818	Chen et. al 2015 Mol. Ecol.	Yes	Yes
NRHc5011.ENR	VNBI		α	Botswana	Clinical	G84322	SRR1926082, SRR1942886, SRR1943128	Chen et. al 2015 Mol. Ecol.	Yes	Yes
NRHc5013.ENR	VNBI		a	Botswana	Clinical	G84324	SRR1942968, SRR1944849, SRR1944851	Chen et. al 2015 Mol. Ecol.	Yes	Yes
NRHc5013.REL.INI	VNBI		a	Botswana	Clinical	G84325	SRR1925888, SRR1943062, SRR1944794	Chen et. al 2015 Mol. Ecol.	Yes	Yes
NRHc5019.ENR	VNBI		α	Botswana	Clinical	G84331	SRR1931717, SRR1944686, SRR1944741	Chen et. al 2015 Mol. Ecol.	Yes	Yes
NRHc5020.ENR	VNBI		a	Botswana	Clinical	G84332	SRR1931718, SRR1944698, SRR1944734	Chen et. al 2015 Mol. Ecol.	Yes	Yes
NRHc5021.ENR	VNBI		a	Botswana	Clinical	G84333	SRR1926047, SRR1931726, SRR1944705	Chen et. al 2015 Mol. Ecol.	Yes	Yes
NRHc5022.ENR	VNBI		α	Botswana	Clinical	G84334	SRR1931722, SRR1944685, SRR1944702	Chen et. al 2015 Mol. Ecol.	Yes	Yes
NRHc5023.ENR	VNBI		α	Botswana	Clinical	G84335	SRR1943219, SRR1944728, SRR1944871	Chen et. al 2015 Mol. Ecol.	Yes	Yes
NRHc5024.ENR.CLIN.1	VNBI		α	Botswana	Clinical	G84336	SRR1926029, SRR1943126, SRR1944720	Chen et. al 2015 Mol. Ecol.	Yes	Yes
NRHc5024A.ENR.CLIN.ISO	VNBI		α	Botswana	Clinical	G84337	SRR1942917, SRR1944711, SRR1944848	Chen et. al 2015 Mol. Ecol.	Yes	Yes
NRHc5026.ENR.CLIN.ISO	VNBI		α	Botswana	Clinical	G84339	SRR1925914, SRR1926012, SRR1942996	Chen et. al 2015 Mol. Ecol.	Yes	Yes
NRHc5027.ENR.CLIN1	VNBI		α	Botswana	Clinical	G84340	SRR1925984, SRR1943110, SRR1944800	Chen et. al 2015 Mol. Ecol.	Yes	Yes
NRHc5029.ENR.CLIN.ISO	VNBI		α	Botswana	Clinical	G84342	SRR1925891, SRR1943068, SRR1943130	Chen et. al 2015 Mol. Ecol.	Yes	Yes
NRHc5030.ENR.CLIN.ISO	VNBI		a	Botswana	Clinical	G84343	SRR1925880, SRR1942898, SRR1944802	Chen et. al 2015 Mol. Ecol.	Yes	Yes
NRHc5032.ENR.CLIN.ISO	VNBI		α	Botswana	Clinical	G84345	SRR1925908, SRR1926015, SRR1942891	Chen et. al 2015 Mol. Ecol.	Yes	Yes
NRHc5035.ENR.CLIN.ISO	VNBI		α	Botswana	Clinical	G84348	SRR1925903, SRR1943007, SRR1944760	Chen et. al 2015 Mol. Ecol.	Yes	Yes
NRHc5037.ENR.CLIN1	VNBI		a	Botswana	Clinical	G84350	SRR1931706, SRR1944713, SRR1944861	Chen et. al 2015 Mol. Ecol.	Yes	Yes
NRHc5039.ENR.STOR	VNBI		α	Botswana	Clinical	G84352	SRR1925904, SRR1925991, SRR1926023	Chen et. al 2015 Mol. Ecol.	Yes	Yes
NRHc5040.ENR.CLIN.ISO	VNBI		α	Botswana	Clinical	G84353	SRR1943004, SRR1943012, SRR1943019	Chen et. al 2015 Mol. Ecol.	Yes	Yes
NRHc5041.ENR.STOR	VNBI		α	Botswana	Clinical	G84354	SRR1926040, SRR1943117, SRR1944780	Chen et. al 2015 Mol. Ecol.	Yes	Yes
NRHc5042.ENR.STOR	VNBI		α	Botswana	Clinical	G84355	SRR1942973, SRR1944813, SRR1944844	Chen et. al 2015 Mol. Ecol.	Yes	Yes
NRHc5045.ENR.CLIN.ISO	VNBI		a	Botswana	Clinical	G84357	SRR1943021, SRR1947212, SRR1947255	Chen et. al 2015 Mol. Ecol.	Yes	Yes
PLR10	VNBI		α	Botswana	Mopane tree	G27179	SRX273194, SRX273195	Litvintseva et al 2011 PLoS One	Yes	Yes
PMHc1001.ENR	VNBI		α	Botswana	Clinical	G84275	SRR1943011, SRR1943013, SRR1947257	Chen et. al 2015 Mol. Ecol.	Yes	Yes
PMHc1011.ENR	VNBI		a	Botswana	Clinical	G84278	SRR1942986, SRR1925901, SRR1943109, SRR1944819	Chen et. al 2015 Mol. Ecol.	Yes	Yes
PMHc1014.ENR	VNBI		a	Botswana	Clinical	G84281	SRR1926060, SRR1943016, SRR1944784	Chen et. al 2015 Mol. Ecol.	Yes	Yes
PMHc1026.ENR	VNBI		α	Botswana	Clinical	G84293	SRR1926038, SRR1926046, SRR1944778	Chen et. al 2015 Mol. Ecol.	Yes	Yes
PMHc1030.ENR.CLIN.ISO	VNBI		α	Botswana	Clinical	G84295	SRR1925922, SRR1944738, SRR1944769	Chen et. al 2015 Mol. Ecol.	Yes	Yes
PMHc1038.ENR.CLIN1	VNBI		α	Botswana	Clinical	G84302	SRR1925907, SRR1944744, SRR1944747	Chen et. al 2015 Mol. Ecol.	Yes	Yes
PMHc1050.ENR.CLIN1	VNBI		α	Botswana	Clinical	G84312	SRR1926002, SRR1943129, SRR1944750	Chen et. al 2015 Mol. Ecol.	Yes	Yes
RTC3	VNBI		α	Botswana	CSF /HIV+	G27171	SRX273199, SRX273200	Litvintseva et al 2011 PLoS One	Yes	Yes
Tu229-1	VNBI		α	Botswana	Mopane tree	G27188	SRX273202, SRX273203	Litvintseva et al 2011 PLoS One	Yes	Yes
Tu360-1	VNBI		α	Botswana	Mopane tree	G27150	SRX273208, SRX273209	Litvintseva et al 2011 PLoS One	Yes	Yes
Tu369-1	VNBI		α	Botswana	Mopane tree	G27129	SRX273212, SRX273211, SRX273213	Litvintseva et al 2011 PLoS One	Yes	Yes
Tu401-1	VNBI		α	Botswana	Mopane tree	G18562	SRX189632, SRX189623	Litvintseva et al 2011 PLoS One	Yes	Yes
Tu406-1	VNBI		α	Botswana	Mopane tree	G27189	SRX273216, SRX273214, SRX273215	Litvintseva et al 2011 PLoS One	Yes	Yes
Tu416-1	VNBI		α	Botswana	Mopane tree	G27142	SRX273217, SRX273218, SRX273219	Litvintseva et al 2011 PLoS One	Yes	Yes
Tu422-1	VNBI		a	Botswana	Mopane tree	G27170	SRX273263, SRX273264	Litvintseva et al 2011 PLoS One	Yes	Yes
Bt1	VNBII		α	Botswana	CSF /HIV+	G18555	SRX189615, SRX189609, SRX189375	Litvintseva et al 2003 Euk. Cell, Litvintseva et al 2006 Genetics	Yes	Yes
Bt10	VNBII		α	Botswana	CSF /HIV+	G26311	SRX255612, SRX256421, SRX256459	Litvintseva et al 2003 Euk. Cell	Yes	Yes
Bt103	VNBII		α	Botswana	CSF /HIV+	G26304	SRX255644, SRX255611, SRX256442	Litvintseva et al 2003 Euk. Cell	Yes	Yes
Bt105	VNBII		α	Botswana	CSF /HIV+	G27130	SRX273121, SRX273122, SRX404420	Litvintseva et al 2003 Euk. Cell	Yes	Yes
Bt109	VNBII		α	Botswana	CSF /HIV+	G27120	SRX273124, SRX273123	Litvintseva et al 2003 Euk. Cell	Yes	Yes
Bt115	VNBII		α	Botswana	CSF /HIV+	G27180	SRX273126, SRX273125	Litvintseva et al 2003 Euk. Cell	Yes	Yes
Bt128	VNBII		α	Botswana	CSF /HIV+	G27119	SRX273130, SRX273131	Litvintseva et al 2003 Euk. Cell	Yes	No
Bt133	VNBII		a	Botswana	CSF /HIV+	G27162	SRX273143, SRX273141, SRX273142	Litvintseva et al 2003 Euk. Cell	Yes	Yes
Bt136	VNBII		α	Botswana	CSF /HIV+	G27140	SRX273145, SRX273144	Litvintseva et al 2003 Euk. Cell	Yes	Yes
Bt143	VNBII		α	Botswana	CSF /HIV+	G27172	SRX273151, SRX273150, SRX273152	Litvintseva et al 2003 Euk. Cell	Yes	Yes
Bt146	VNBII		α	Botswana	CSF /HIV+	G27181	SRX273155, SRX273153, SRX273154	Litvintseva et al 2003 Euk. Cell	Yes	Yes
Bt149	VNBII		α	Botswana	CSF /HIV+	G27133	SRX273159	Litvintseva et al 2003 Euk. Cell	Yes	Yes
Bt152	VNBII		α	Botswana	CSF /HIV+	G27174	SRX273160	Litvintseva et al 2003 Euk. Cell	Yes	Yes
Bt157	VNBII		α	Botswana	CSF /HIV+	G27177	SRX273164	Litvintseva et al 2003 Euk. Cell, Litvintseva et al 2006 Genetics	Yes	Yes
Bt206	VNBII		a	Botswana	CSF /HIV+	G18561	SRX189601, SRX189620, SRX189374	Litvintseva et al 2003 Euk. Cell, Litvintseva et al 2006 Genetics	Yes	Yes
Bt208	VNBII		α	Botswana	CSF /HIV+	G27134	SRX273169	Litvintseva et al 2003 Euk. Cell	Yes	Yes
Bt25	VNBII		α	Botswana	CSF /HIV+	G26312	SRX255642, SRX256531, SRX256396	Litvintseva et al 2003 Euk. Cell	Yes	Yes
Bt27	VNBII		α	Botswana	CSF /HIV+	G25964	SRX256032, SRX255615	Litvintseva et al 2003 Euk. Cell	Yes	Yes
Bt31	VNBII		α	Botswana	CSF /HIV+	G25968	SRX255961, SRX255966, SRX256066	Litvintseva et al 2003 Euk. Cell	Yes	Yes
Bt32	VNBII		α	Botswana	CSF /HIV+	G25973	SRX255607, SRX255619	Litvintseva et al 2003 Euk. Cell	Yes	Yes
Bt33	VNBII		α	Botswana	CSF /HIV+	G25978	SRX256430, SRX255955	Litvintseva et al 2003 Euk. Cell	Yes	Yes
Bt34	VNBII		α	Botswana	CSF /HIV+	G25986	SRX255950, SRX256497, SRX256438	Litvintseva et al 2003 Euk. Cell, Litvintseva et al 2006 Genetics	Yes	Yes
Bt35	VNBII		α	Botswana	CSF /HIV+	G26124	SRX399940	Litvintseva et al 2003 Euk. Cell	Yes	Yes
Bt38	VNBII		α	Botswana	CSF /HIV+	G25993	SRX256017, SRX256416	Litvintseva et al 2003 Euk. Cell	Yes	Yes
Bt39	VNBII		α	Botswana	CSF /HIV+	G25965	SRX256051, SRX256385	Litvintseva et al 2003 Euk. Cell	Yes	Yes
Bt40	VNBII		α	Botswana	CSF /HIV+	G25969	SRX256029, SRX255946	Litvintseva et al 2003 Euk. Cell	Yes	Yes
Bt41	VNBII		α	Botswana	CSF /HIV+	G25974	SRX256062, SRX255606	Litvintseva et al 2003 Euk. Cell	Yes	Yes
Bt46	VNBII		α	Botswana	CSF /HIV+	G26300	SRX256501, SRX256011, SRX256538	Litvintseva et al 2003 Euk. Cell	Yes	Yes
Bt5	VNBII		α	Botswana	CSF /HIV+	G25979	SRX256355, SRX256055	Litvintseva et al 2003 Euk. Cell	Yes	Yes
Bt52	VNBII		α	Botswana	CSF /HIV+	G25987	SRX256371, SRX256013	Litvintseva et al 2003 Euk. Cell	Yes	Yes
Bt53	VNBII		α	Botswana	CSF /HIV+	G25991	SRX256021, SRX256056, SRX404421	Litvintseva et al 2003 Euk. Cell	Yes	Yes
Bt54	VNBII		α	Botswana	CSF /HIV+	G25994	SRX255597, SRX256004	Litvintseva et al 2003 Euk. Cell	Yes	Yes
Bt55	VNBII		α	Botswana	CSF /HIV+	G25970	SRX255599, SRX256482, SRX255636	Litvintseva et al 2003 Euk. Cell	Yes	Yes
Bt56	VNBII		α	Botswana	CSF /HIV+	G25975	SRX256397, SRX256507, SRX255991	Litvintseva et al 2003 Euk. Cell	Yes	Yes
Bt65	VNBII		a	Botswana	CSF /HIV+	G27121	SRX273172, SRX273174, SRX273173	Litvintseva et al 2003 Euk. Cell	Yes	Yes
Bt75	VNBII		α	Botswana	CSF /HIV+	G25980	SRX256015, SRX272108, SRX255637	Litvintseva et al 2003 Euk. Cell	Yes	Yes
Bt76	VNBII		α	Botswana	CSF /HIV+	G25984	SRX255602, SRX255580, SRX256359	Litvintseva et al 2003 Euk. Cell, Litvintseva et al 2006 Genetics	Yes	Yes
Bt81	VNBII		a	Botswana	CSF /HIV+	G25988	SRX256380, SRX256047	Litvintseva et al 2003 Euk. Cell	Yes	Yes
Bt84	VNBII		α	Botswana	CSF /HIV+	G25992	SRX255974, SRX255986	Litvintseva et al 2003 Euk. Cell	Yes	Yes
Bt88	VNBII		a	Botswana	CSF /HIV+	G25995	SRX256010, SRX272109, SRX256352	Litvintseva et al 2003 Euk. Cell, Litvintseva et al 2006 Genetics	Yes	Yes
Bt89	VNBII		α	Botswana	CSF /HIV+	G25966	SRX255594, SRX255662	Litvintseva et al 2003 Euk. Cell	Yes	Yes
Bt98	VNBII		α	Botswana	CSF /HIV+	G26296	SRX255957, SRX256508, SRX255624	Litvintseva et al 2003 Euk. Cell	Yes	Yes
LP-RSA3144	VNBII		α	S. Africa	Clinical	G27139	SRX273179, SRX273180	Litvintseva et al 2011 PLoS One	Yes	Yes
MW-RSA1186	VNBII		α	S. Africa	Clinical	G27128	SRX273187, SRX273188	Van Wyk et al 2014 J. Clin. Microbiol.	Yes	Yes
MW-RSA1607	VNBII		α	S. Africa	Clinical	G27131	SRX273189, SRX273355, SRX273190	Van Wyk et al 2014 J. Clin. Microbiol.	Yes	Yes
MW-RSA2967	VNBII		α	S. Africa	Clinical	G27126	SRX273191	Van Wyk et al 2014 J. Clin. Microbiol.	Yes	Yes
MW-RSA3179	VNBII		α	S. Africa	Clinical	G27147	SRX273192	Van Wyk et al 2014 J. Clin. Microbiol.	Yes	Yes
MW-RSA3321	VNBII		α	S. Africa	Clinical	G27123	SRX273193	Van Wyk et al 2014 J. Clin. Microbiol.	Yes	Yes
MW-RSA913	VNBII		α	S. Africa	Clinical	G27190	SRX400073, SRX400071, SRX400072	Van Wyk et al 2014 J. Clin. Microbiol.	Yes	Yes
Muc387-1	VNBII		α	Botswana	Mopane tree	G84251	SRR1942887, SRR1944832, SRR1944835	Chen et. al 2015 Mol. Ecol.	Yes	Yes
Muc387-2	VNBII		α	Botswana	Mopane tree	G84252	SRR1925985, SRR1944718, SRR1944724	Chen et. al 2015 Mol. Ecol.	Yes	Yes
NRHc5008.ENR	VNBII		a	Botswana	Clinical	G84318	SRR1931697, SRR1944807, SRR1944811	Chen et. al 2015 Mol. Ecol.	Yes	Yes
NRHc5014.ENR	VNBII		a	Botswana	Clinical	G84326	SRR1925974, SRR1925999, SRR1944768	Chen et. al 2015 Mol. Ecol.	Yes	Yes
NRHc5031.ENR.CLIN.ISO	VNBII		α	Botswana	Clinical	G84344	SRR1926020, SRR1943159, SRR1944756	Chen et. al 2015 Mol. Ecol.	Yes	Yes
PMHc1002.ENR	VNBII		α	Botswana	Clinical	G84276	SRR1925994, SRR1926084, SRR1943001	Chen et. al 2015 Mol. Ecol.	Yes	Yes
PMHc1009.ENR	VNBII		α	Botswana	Clinical	G84277	SRR1926011, SRR1926036, SRR1944775	Chen et. al 2015 Mol. Ecol.	Yes	Yes
PMHc1024.ENR	VNBII		a	Botswana	Clinical	G84291	SRR1926008, SRR1944740, SRR1944825	Chen et. al 2015 Mol. Ecol.	Yes	Yes
PMHc1029.ENR.STOR	VNBII		α	Botswana	Clinical	G84294	SRR1926072, SRR1943065, SRR1944730	Chen et. al 2015 Mol. Ecol.	Yes	No
PMHc1033.ENR	VNBII		α	Botswana	Clinical	G84298	SRR1925899, SRR1944786, SRR1944791	Chen et. al 2015 Mol. Ecol.	Yes	No
PMHc1035.ENR.STOR	VNBII		α	Botswana	Clinical	G84300	SRR1926070, SRR1942974, SRR1943059	Chen et. al 2015 Mol. Ecol.	Yes	No
PMHc1047.ENR.CLIN1	VNBII		α	Botswana	Clinical	G84309	SRR1942908, SRR1944828, SRR1944862	Chen et. al 2015 Mol. Ecol.	Yes	No
PMHc1049.THER1.STOR	VNBII		α	Botswana	Clinical	G84311	SRR1925935, SRR1944777, SRR1944793	Chen et. al 2015 Mol. Ecol.	Yes	No
PMHc1052.ENR.STOR	VNBII		a	Botswana	Clinical	G84313	SRR1925900, SRR1925986, SRR1944755	Chen et. al 2015 Mol. Ecol.	Yes	No
Ze90-1	VNBII		α	S. Africa	Eucalyptus tree	G18574	SRX189605, SRX189369, SRX189608	Litvintseva et al 2011 PLoS One	Yes	No
125.91	VNI	VNIa	a	Tanzania	Clinical	G18554	SRX189626, SRX189365, SRX189597	Litvintseva et al 2011 PLoS One, Litvintseva et al 2007 PLoS Pathogens	No	No
A1-35-8	VNI	VNIb	α	USA	pigeon guano	G26303	SRX256414, SRX255598, SRX256045	Litvintseva et al 2009 Infect Immun, Litvintseva et al 2006 Genetics	No	No
A1-84-14	VNI	VNIb	α	USA	pigeon guano	G26155	SRX400058	Litvintseva et al 2009 Infect Immun, Litvintseva et al 2006 Genetics	No	No
A2-102-5	VNI	VNIa	α	USA	pigeon guano	G18557	SRX189598, SRX189607, SRX189370	Litvintseva et al 2009 Infect Immun, Litvintseva et al 2006 Genetics	No	No
A3-1-1	VNI	VNIb	α	USA	pigeon guano	G26305	SRX256003, SRX255639, SRX256020	Litvintseva et al 2006 Genetics	No	No
A3-38-20	VNI	VNIb	α	USA	pigeon guano	G26160	SRX256356	Litvintseva et al 2009 Infect Immun, Litvintseva et al 2006 Genetics	No	No
A4-1-12	VNI	VNIb	α	USA	pigeon guano	G26164	SRX256399	Litvintseva et al 2006 Genetics	No	No
A4-34-6	VNI	VNIa	α	USA	pigeon guano	G26167	SRX256440	Litvintseva et al 2009 Infect Immun, Litvintseva et al 2006 Genetics	No	No
A5-35-17	VNI	VNIa	α	USA	pigeon guano	G26307	SRX256064, SRX255575, SRX255941	Litvintseva et al 2009 Infect Immun, Litvintseva et al 2006 Genetics	No	No
AD1-68a	VNI	VNIa	α	France	Clinical	G27122	SRX273086	Dromer et al 2007 PLoS Med	No	No
AD1-86a	VNI	VNIa	α	France	Clinical	G27144	SRX273087	Dromer et al 2007 PLoS Med	No	No
AD1-90a	VNI	VNIb	α	France	Clinical	G27169	SRX273089	Dromer et al 2007 PLoS Med	No	No
AD1-95a	VNI	VNIb	α	France	Clinical	G27159	SRX273090	Dromer et al 2007 PLoS Med	No	No
AD1-7a	VNI	VNIb	α	France	Clinical	G18578	SRX189617	Dromer et al 2007 PLoS Med	No	No
AD1-83a	VNI	VNIa	α	France	Clinical	G18570	SRX189622	Dromer et al 2007 PLoS Med	No	No
AD2-04a	VNI	VNIa	α	France	Clinical	G27149	SRX273091	Dromer et al 2007 PLoS Med	No	No
AD2-6a	VNI	VNIb	α	France	Clinical	G27143	SRX273092, SRX273094, SRX273093	Dromer et al 2007 PLoS Med	No	No
AD2-82a	VNI	VNIa	α	France	Clinical	G27127	SRX273095	Dromer et al 2007 PLoS Med	No	No
AD2-99a	VNI	VNIb	α	France	Clinical	G27182	SRX273096	Dromer et al 2007 PLoS Med	No	No
AD2-60a	VNI	VNIb	α	France	Clinical	G18556	SRX189592, SRX189368, SRX189604	Dromer et al 2007 PLoS Med	No	No
AD3-41a	VNI	VNIb	α	France	Clinical	G27191	SRX273099	Dromer et al 2007 PLoS Med	No	No
AD3-55a	VNI	VNIb	α	France	Clinical	G27164	SRX273100	Dromer et al 2007 PLoS Med	No	No
AD3-58	VNI	VNIb	α	France	Clinical	G27192	SRX273101	Dromer et al 2007 PLoS Med	No	No
AD3-83a	VNI	VNIb	α	France	Clinical	G27145	SRX273103	Dromer et al 2007 PLoS Med	No	No
AD3-95a	VNI	VNIa	α	France	Clinical	G27183	SRX273104	Dromer et al 2007 PLoS Med	No	No
AD4-47a	VNI	VNIb	α	France	Clinical	G27148	SRX273107	Dromer et al 2007 PLoS Med	No	No
AD4-63a	VNI	VNIa	α	France	Clinical	G27195	SRX273108	Dromer et al 2007 PLoS Med	No	No
AD4-76a	VNI	VNIa	α	France	Clinical	G27163	SRX273109	Dromer et al 2007 PLoS Med	No	No
AD4-92a	VNI	VNIb	α	France	Clinical	G27194	SRX273111	Dromer et al 2007 PLoS Med	No	No
AD5-39a	VNI	VNIa	α	France	Clinical	G27173	SRX273112	Dromer et al 2007 PLoS Med	No	No
AD5-45a	VNI	VNIb	α	France	Clinical	G27196	SRX273113	Dromer et al 2007 PLoS Med	No	No
AD5-53a	VNI	VNIa	α	France	Clinical	G27158	SRX273114	Dromer et al 2007 PLoS Med	No	No
AD6-54a	VNI	VNIb	α	France	Clinical	G27178	SRX273117	Dromer et al 2007 PLoS Med	No	No
AD6-55a	VNI	VNIb	α	France	Clinical	G27124	SRX273118	Dromer et al 2007 PLoS Med	No	No
Arg1366	VNI	VNIb	α	Argentina	Clinical	G27132	SRX273120	Litvintseva et al 2006 Genetics	No	No
Br795	VNI	VNIa	α	Brazil	Clinical	G18566	SRX189621	Litvintseva et al 2006 Genetics	No	No
Bt100	VNI	VNIc	α	Botswana	CSF /HIV+	G26313	SRX256049, SRX256462, SRX255668	Litvintseva et al 2003 Euk. Cell, Litvintseva et al 2006 Genetics	No	No
Bt101	VNI	VNIc	α	Botswana	CSF /HIV+	G26314	SRX255990, SRX255627, SRX256422	Litvintseva et al 2003 Euk. Cell	No	No
Bt104	VNI	VNIc	α	Botswana	CSF /HIV+	G26139	SRX256486	Litvintseva et al 2003 Euk. Cell	No	No
Bt106	VNI	VNIc	α	Botswana	CSF /HIV+	G26143	SRX255576	Litvintseva et al 2003 Euk. Cell	No	No
Bt107	VNI	VNIa	α	Botswana	CSF /HIV+	G26147	SRX255648	Litvintseva et al 2003 Euk. Cell	No	No
Bt108	VNI	VNIc	α	Botswana	CSF /HIV+	G26151	SRX256444	Litvintseva et al 2003 Euk. Cell	No	No
Bt11	VNI	VNIc	α	Botswana	CSF /HIV+	G26156	SRX256425	Litvintseva et al 2003 Euk. Cell	No	No
Bt110	VNI	VNIc	α	Botswana	CSF /HIV+	G26161	SRX256465	Litvintseva et al 2003 Euk. Cell	No	No
Bt111	VNI	VNIb	α	Botswana	CSF /HIV+	G26168	SRX256485	Litvintseva et al 2003 Euk. Cell	No	No
Bt114	VNI	VNIc	α	Botswana	CSF /HIV+	G26140	SRX256012	Litvintseva et al 2003 Euk. Cell	No	No
Bt116	VNI	VNIc	α	Botswana	CSF /HIV+	G26144	SRX256518	Litvintseva et al 2003 Euk. Cell	No	No
Bt117	VNI	VNIc	α	Botswana	CSF /HIV+	G26148	SRX256502	Litvintseva et al 2003 Euk. Cell	No	No
Bt118	VNI	VNIc	α	Botswana	CSF /HIV+	G26152	SRX255609	Litvintseva et al 2003 Euk. Cell	No	No
Bt119	VNI	VNIa	α	Botswana	CSF /HIV+	G26157	SRX255995	Litvintseva et al 2003 Euk. Cell	No	No
Bt120	VNI	VNIc	α	Botswana	CSF /HIV+	G18571	SRX189625, SRX256457	Litvintseva et al 2003 Euk. Cell	No	No
Bt121	VNI	VNIc	α	Botswana	CSF /HIV+	G26162	SRX256460	Litvintseva et al 2003 Euk. Cell, Litvintseva et al 2006 Genetics	No	No
Bt123	VNI	VNIc	α	Botswana	CSF /HIV+	G26165	SRX255655	Litvintseva et al 2003 Euk. Cell	No	No
Bt126	VNI	VNIc	α	Botswana	CSF /HIV+	G26169	SRX255973	Litvintseva et al 2003 Euk. Cell	No	No
Bt129	VNI	VNIc	α	Botswana	CSF /HIV+	G26145	SRX256022	Litvintseva et al 2003 Euk. Cell	No	No
Bt130	VNI	VNIc	a	Botswana	CSF /HIV+	G26149	SRX255625	Litvintseva et al 2003 Euk. Cell, Litvintseva et al 2006 Genetics	No	No
Bt132	VNI	VNIa	α	Botswana	CSF /HIV+	G26121	SRX255981	Litvintseva et al 2003 Euk. Cell	No	No
Bt134	VNI	VNIa	α	Botswana	CSF /HIV+	G26153	SRX255669	Litvintseva et al 2003 Euk. Cell, Litvintseva et al 2006 Genetics	No	No
Bt137	VNI	VNIc	α	Botswana	CSF /HIV+	G26158	SRX256392	Litvintseva et al 2003 Euk. Cell	No	No
Bt138	VNI	VNIa	α	Botswana	CSF /HIV+	G27152	SRX273148, SRX273147, SRX273149	Litvintseva et al 2003 Euk. Cell	No	No
Bt139	VNI	VNIa	α	Botswana	CSF /HIV+	G26163	SRX255620	Litvintseva et al 2003 Euk. Cell	No	No
Bt141	VNI	VNIa	α	Botswana	CSF /HIV+	G26166	SRX255992	Litvintseva et al 2003 Euk. Cell	No	No
Bt15	VNI	VNIc	α	Botswana	CSF /HIV+	G18564	SRX189606, SRX189613, SRX189376	Litvintseva et al 2003 Euk. Cell, Litvintseva et al 2006 Genetics	No	No
Bt150	VNI	VNIc	α	Botswana	CSF /HIV+	G26306	SRX255654, SRX256512, SRX255972	Litvintseva et al 2003 Euk. Cell, Litvintseva et al 2006 Genetics	No	No
Bt151	VNI	VNIc	α	Botswana	CSF /HIV+	G26170	SRX256461	Litvintseva et al 2003 Euk. Cell	No	No
Bt153	VNI	VNIc	α	Botswana	CSF /HIV+	G26142	SRX256377	Litvintseva et al 2003 Euk. Cell	No	No
Bt155	VNI	VNIc	α	Botswana	CSF /HIV+	G26146	SRX255632	Litvintseva et al 2003 Euk. Cell	No	No
Bt156	VNI	VNIc	α	Botswana	CSF /HIV+	G26150	SRX255984	Litvintseva et al 2003 Euk. Cell	No	No
Bt160	VNI	VNIc	α	Botswana	CSF /HIV+	G26154	SRX255659	Litvintseva et al 2003 Euk. Cell	No	No
Bt161	VNI	VNIc	α	Botswana	CSF /HIV+	G26159	SRX256058	Litvintseva et al 2003 Euk. Cell	No	No
Bt164	VNI	VNIa	α	Botswana	CSF /HIV+	G26123	SRX256395	Litvintseva et al 2003 Euk. Cell	No	No
Bt17	VNI	VNIc	α	Botswana	CSF /HIV+	G26126	SRX256353	Litvintseva et al 2003 Euk. Cell	No	No
Bt18	VNI	VNIa	α	Botswana	CSF /HIV+	G26129	SRX255956	Litvintseva et al 2003 Euk. Cell	No	No
Bt19	VNI	VNIc	α	Botswana	CSF /HIV+	G26133	SRX255658	Litvintseva et al 2003 Euk. Cell	No	No
Bt2	VNI	VNIc	α	Botswana	CSF /HIV+	G26135	SRX255634	Litvintseva et al 2003 Euk. Cell	No	No
Bt20	VNI	VNIc	α	Botswana	CSF /HIV+	G26137	SRX255975	Litvintseva et al 2003 Euk. Cell	No	No
Bt202	VNI	VNIc	α	Botswana	CSF /HIV+	G26122	SRX256037	Litvintseva et al 2003 Euk. Cell	No	No
Bt203	VNI	VNIc	α	Botswana	CSF /HIV+	G26021	SRX255630, SRX256426	Litvintseva et al 2003 Euk. Cell	No	No
Bt205	VNI	VNIc	α	Botswana	CSF /HIV+	G26028	SRX256443, SRX256487	Litvintseva et al 2003 Euk. Cell	No	No
Bt207	VNI	VNIc	α	Botswana	CSF /HIV+	G26035	SRX256393, SRX256018	Litvintseva et al 2003 Euk. Cell	No	No
Bt209	VNI	VNIc	α	Botswana	CSF /HIV+	G26046	SRX256424, SRX256054	Litvintseva et al 2003 Euk. Cell	No	No
Bt210	VNI	VNIc	α	Botswana	CSF /HIV+	G26052	SRX286887, SRX422948, SRX422781	Litvintseva et al 2003 Euk. Cell	No	No
Bt211	VNI	VNIc	α	Botswana	CSF /HIV+	G26057	SRX256553, SRX255574	Litvintseva et al 2003 Euk. Cell	No	No
Bt212	VNI	VNIa	α	Botswana	CSF /HIV+	G26016	SRX255593, SRX255978	Litvintseva et al 2003 Euk. Cell	No	No
Bt213	VNI	VNIc	α	Botswana	CSF /HIV+	G26022	SRX256381, SRX255581	Litvintseva et al 2003 Euk. Cell	No	No
Bt214	VNI	VNIc	α	Botswana	CSF /HIV+	G26029	SRX256366, SRX256016	Litvintseva et al 2003 Euk. Cell	No	No
Bt23	VNI	VNIc	α	Botswana	CSF /HIV+	G26036	SRX256456, SRX255621	Litvintseva et al 2003 Euk. Cell	No	No
Bt28	VNI	VNIa	α	Botswana	CSF /HIV+	G26041	SRX256053, SRX256370	Litvintseva et al 2003 Euk. Cell	No	No
Bt3	VNI	VNIa	α	Botswana	CSF /HIV+	G26053	SRX255631, SRX256544	Litvintseva et al 2003 Euk. Cell	No	No
Bt30	VNI	VNIc	α	Botswana	CSF /HIV+	G26058	SRX256401, SRX256540	Litvintseva et al 2003 Euk. Cell	No	No
Bt37	VNI	VNIc	α	Botswana	CSF /HIV+	G26023	SRX255629, SRX255588	Litvintseva et al 2003 Euk. Cell	No	No
Bt4	VNI	VNIc	α	Botswana	CSF /HIV+	G27155	SRX273170	Litvintseva et al 2003 Euk. Cell	No	No
Bt42	VNI	VNIc	α	Botswana	CSF /HIV+	G26030	SRX256436, SRX255583	Litvintseva et al 2003 Euk. Cell	No	No
Bt43	VNI	VNIc	α	Botswana	CSF /HIV+	G26127	SRX255596	Litvintseva et al 2003 Euk. Cell	No	No
Bt44	VNI	VNIc	α	Botswana	CSF /HIV+	G26130	SRX256014	Litvintseva et al 2003 Euk. Cell	No	No
Bt47	VNI	VNIc	α	Botswana	CSF /HIV+	G26132	SRX256419	Litvintseva et al 2003 Euk. Cell	No	No
Bt48	VNI	VNIa	α	Botswana	CSF /HIV+	G26037	SRX256493, SRX256491	Litvintseva et al 2003 Euk. Cell	No	No
Bt49	VNI	VNIb	α	Botswana	CSF /HIV+	G26042	SRX255667, SRX256515	Litvintseva et al 2003 Euk. Cell	No	No
Bt57	VNI	VNIc	α	Botswana	CSF /HIV+	G26054	SRX256549, SRX256551	Litvintseva et al 2003 Euk. Cell	No	No
Bt58	VNI	VNIa	α	Botswana	CSF /HIV+	G26059	SRX256524, SRX256529	Litvintseva et al 2003 Euk. Cell	No	No
Bt59	VNI	VNIc	α	Botswana	CSF /HIV+	G26017	SRX256446, SRX256445	Litvintseva et al 2003 Euk. Cell	No	No
Bt6	VNI	VNIa	α	Botswana	CSF /HIV+	G26024	SRX256417, SRX255970	Litvintseva et al 2003 Euk. Cell	No	No
Bt62	VNI	VNIc	α	Botswana	CSF /HIV+	G26134	SRX256473	Litvintseva et al 2003 Euk. Cell	No	No
Bt68	VNI	VNIc	α	Botswana	CSF /HIV+	G26285	SRX255645, SRX256065, SRX256063	Litvintseva et al 2003 Euk. Cell, Litvintseva et al 2006 Genetics	No	No
Bt72	VNI	VNIc	α	Botswana	CSF /HIV+	G26031	SRX256526, SRX256007	Litvintseva et al 2003 Euk. Cell	No	No
Bt77	VNI	VNIc	α	Botswana	CSF /HIV+	G26038	SRX256435, SRX256534	Litvintseva et al 2003 Euk. Cell	No	No
Bt78	VNI	VNIc	α	Botswana	CSF /HIV+	G26043	SRX256358, SRX256008	Litvintseva et al 2003 Euk. Cell	No	No
Bt79	VNI	VNIc	α	Botswana	CSF /HIV+	G26049	SRX256028, SRX256547	Litvintseva et al 2003 Euk. Cell	No	No
Bt8	VNI	VNIc	α	Botswana	CSF /HIV+	G26060	SRX256543, SRX256504	Litvintseva et al 2003 Euk. Cell	No	No
Bt83	VNI	VNIc	α	Botswana	CSF /HIV+	G26018	SRX256420, SRX256387	Litvintseva et al 2003 Euk. Cell	No	No
Bt87	VNI	VNIc	α	Botswana	CSF /HIV+	G26025	SRX256030, SRX256009	Litvintseva et al 2003 Euk. Cell	No	No
Bt90	VNI	VNIc	α	Botswana	CSF /HIV+	G26032	SRX256548, SRX256402	Litvintseva et al 2003 Euk. Cell	No	No
Bt92	VNI	VNIa	α	Botswana	CSF /HIV+	G25976	SRX256480, SRX256383	Litvintseva et al 2003 Euk. Cell	No	No
Bt93	VNI	VNIc	α	Botswana	CSF /HIV+	G26039	SRX256514, SRX255969	Litvintseva et al 2003 Euk. Cell	No	No
Bt95	VNI	VNIc	α	Botswana	CSF /HIV+	G26044	SRX256483, SRX256477	Litvintseva et al 2003 Euk. Cell	No	No
Bt97	VNI	VNIc	α	Botswana	CSF /HIV+	G26138	SRX256475	Litvintseva et al 2003 Euk. Cell	No	No
Bt99	VNI	VNIa	α	Botswana	CSF /HIV+	G26301	SRX255577, SRX256513, SRX256448	Litvintseva et al 2003 Euk. Cell	No	No
C23	VNI	VNIb	α	USA	bronch. wash/HIV-	G18558	SRX189595, SRX189372, SRX189600	Litvintseva et al 2009 Infect Immun, Litvintseva et al 2006 Genetics	No	No
C27	VNI	VNIa	α	USA	CSF/cancer	G26050	SRX256527, SRX256384	Litvintseva et al 2009 Infect Immun, Litvintseva et al 2006 Genetics	No	No
C8	VNI	VNIa	α	USA	CSF/HIV+	G18559	SRX189616, SRX189599, SRX189371	Litvintseva et al 2009 Infect Immun, Litvintseva et al 2006 Genetics	No	No
CHC193	VNI	VNIa	α	China	Clinical	G18573	SRX189603	Chen et al 2008 Emerg Infect Dis	No	No
D17-1	VNI	VNIa	α	S. Africa	pigeon guano	G18577	SRX189596	Litvintseva et al 2011 PLoS One	No	No
Gb118	VNI	VNIa	α	Botswana	pigeon guano	G18569	SRX189618, SRX189624	Chen et. al 2015 Mol. Ecol.	No	No
Gb159-1	VNI	VNIc	α	Botswana	unknown tree	G25981	SRX255647, SRX256412, SRX255618	Chen et. al 2015 Mol. Ecol.	No	No
Gbc16-1	VNI	VNIc	α	Botswana	decayed tree	G84359	SRR1931695, SRR1931700, SRR1944684	Chen et. al 2015 Mol. Ecol.	No	No
Gbc39-1	VNI	VNIc	α	Botswana	Acacia tree	G84360	SRR1926079, SRR1942964, SRR1943070	Chen et. al 2015 Mol. Ecol.	No	No
Gbc39-2	VNI	VNIc	α	Botswana	Acacia tree	G84361	SRR1942967, SRR1942992, SRR1944841	Chen et. al 2015 Mol. Ecol.	No	No
Gbc42-1	VNI	VNIc	α	Botswana	Acacia tree	G84362	SRR1925987, SRR1943064, SRR1944758	Chen et. al 2015 Mol. Ecol.	No	No
Gbc44-1	VNI	VNIc	α	Botswana	Acacia tree	G84363	SRR1925938, SRR1942924, SRR1944789	Chen et. al 2015 Mol. Ecol.	No	No
Gbc51-2	VNI	VNIc	α	Botswana	Acacia tree	G84364	SRR1926013, SRR1931724, SRR1944795	Chen et. al 2015 Mol. Ecol.	No	No
Gbc95-1	VNI	VNIc	α	Botswana	unknown tree	G84365	SRR1926059, SRR1943113, SRR1944733	Chen et. al 2015 Mol. Ecol.	No	No
Gbc98-1	VNI	VNIc	α	Botswana	unknown tree	G84366	SRR1925975, SRR1926035, SRR1943089	Chen et. al 2015 Mol. Ecol.	No	No
IUM-96-28-28	VNI	VNIb	a	Italy	soil	G25985	SRX255590, SRX256406	Viviani et al 2001 Med. Mycol.	No	No
In2632	VNI	VNIa	α	India	Clinical	G27167	SRX273177	Litvintseva et al 2006 Genetics	No	No
Jo278-1	VNI	VNIa	α	S. Africa	soil	G26055	SRX255605, SRX255626	Litvintseva et al 2011 PLoS One	No	No
Jp1088	VNI	VNIa	α	Japan	Clinical	G27176	SRX273178	Litvintseva et al 2006 Genetics	No	No
LP-RSA116	VNI	VNIc	α	S. Africa	Clinical	G25989	SRX255652, SRX255640	Litvintseva et al 2011 PLoS One	No	No
LP-RSA1343	VNI	VNIc	α	S. Africa	Clinical	G25996	SRX255650, SRX256471	Litvintseva et al 2011 PLoS One	No	No
LP-RSA2296	VNI	VNIa	α	S. Africa	Clinical	G25967	SRX255953, SRX255947, SRX256002	Litvintseva et al 2011 PLoS One	No	No
LP-RSA2297	VNI	VNIa	α	S. Africa	Clinical	G26019	SRX400059, SRX400060	Litvintseva et al 2011 PLoS One	No	No
LP-RSA3042	VNI	VNIc	α	S. Africa	Clinical	G25972	SRX255601, SRX272112, SRX255614	Litvintseva et al 2011 PLoS One	No	No
LP-RSA848	VNI	VNIc	α	S. Africa	Clinical	G26026	SRX256059, SRX256542	Litvintseva et al 2011 PLoS One	No	No
MW-RSA1869	VNI	VNIb	α	S. Africa	Clinical	G26033	SRX256048, SRX256394	Van Wyk et al 2014 J. Clin. Microbiol.	No	No
MW-RSA2628	VNI	VNIb	α	S. Africa	Clinical	G25977	SRX256351, SRX255586, SRX255954	Van Wyk et al 2014 J. Clin. Microbiol.	No	No
MW-RSA3834	VNI	VNIc	α	S. Africa	Clinical	G29899	SRX400065, SRX400066	Van Wyk et al 2014 J. Clin. Microbiol.	No	No
MW-RSA524	VNI	VNIc	α	S. Africa	Clinical	G29896	SRX400069, SRX400070	Van Wyk et al 2014 J. Clin. Microbiol.	No	No
MW-RSA5387	VNI	VNIa	α	S. Africa	Clinical	G26045	SRX256423, SRX256373	Van Wyk et al 2014 J. Clin. Microbiol.	No	No
MW-RSA606	VNI	VNIb	α	S. Africa	Clinical	G26051	SRX256499, SRX255982	Van Wyk et al 2014 J. Clin. Microbiol.	No	No
MW-RSA6134	VNI	VNIb	α	S. Africa	Clinical	G26056	SRX256033, SRX256450	Van Wyk et al 2014 J. Clin. Microbiol.	No	No
MW-RSA722	VNI	VNIb	α	S. Africa	Clinical	G26286	SRX256408, SRX255660, SRX256469	Van Wyk et al 2014 J. Clin. Microbiol.	No	No
MW-RSA82	VNI	VNIb	α	S. Africa	Clinical	G26128	SRX256034	Van Wyk et al 2014 J. Clin. Microbiol.	No	No
MW-RSA1955	VNI	VNIa	α	S. Africa	Clinical	G18563	SRX189627	Van Wyk et al 2014 J. Clin. Microbiol.	No	No
MW-RSA36	VNI	VNIa	α	S. Africa	Clinical	G18568	SRX189629	Van Wyk et al 2014 J. Clin. Microbiol.	No	No
NRHc5001.ENR	VNI	VNIc	α	Botswana	Clinical	G84314	SRR1925902, SRR1942906, SRR1944742	Chen et. al 2015 Mol. Ecol.	No	No
NRHc5010.ENR	VNI	VNIa	α	Botswana	Clinical	G84321	SRR1931699, SRR1944737, SRR1944858	Chen et. al 2015 Mol. Ecol.	No	No
NRHc5015.ENR	VNI	VNIc	α	Botswana	Clinical	G84327	SRR1926055, SRR1942927, SRR1943060	Chen et. al 2015 Mol. Ecol.	No	No
NRHc5015.REL.CLIN.ISO	VNI	VNIc	α	Botswana	Clinical	G84328	SRR1942971, SRR1944855, SRR1944865	Chen et. al 2015 Mol. Ecol.	No	No
NRHc5017.ENR	VNI	VNIc	α	Botswana	Clinical	G84329	SRR1925881, SRR1926054, SRR1943072	Chen et. al 2015 Mol. Ecol.	No	No
NRHc5025.ENR.CLIN.1	VNI	VNIa	α	Botswana	Clinical	G84338	SRR1926039, SRR1942899, SRR1942922	Chen et. al 2015 Mol. Ecol.	No	No
NRHc5028.ENR.STOR	VNI	VNIa	α	Botswana	Clinical	G84341	SRR1931698, SRR1944721, SRR1944863	Chen et. al 2015 Mol. Ecol.	No	No
NRHc5036.ENR	VNI	VNIa	α	Botswana	Clinical	G84349	SRR1925911, SRR1943118, SRR1944722	Chen et. al 2015 Mol. Ecol.	No	No
NRHc5044.REL.INI.CLIN.ISO	VNI	VNIa	α	Botswana	Clinical	G84356	SRR1925894, SRR1926014, SRR1944774	Chen et. al 2015 Mol. Ecol.	No	No
NRHc5048.ENR.ISO	VNI	VNIc	α	Botswana	Clinical	G84358	SRR1926048, SRR1942978, SRR1944764	Chen et. al 2015 Mol. Ecol.	No	No
PMHc1018.ENR	VNI	VNIa	α	Botswana	Clinical	G84285	SRR1926080, SRR1942966, SRR1944714	Chen et. al 2015 Mol. Ecol.	No	No
PMHc1020.CLIN.1	VNI	VNIc	α	Botswana	Clinical	G84288	SRR1925952, SRR1944762, SRR1944782	Chen et. al 2015 Mol. Ecol.	No	No
PMHc1022.ENR	VNI	VNIc	α	Botswana	Clinical	G84289	SRR1926056, SRR1944781, SRR1944787	Chen et. al 2015 Mol. Ecol.	No	No
PMHc1031A.ENR.INI.LP	VNI	VNIc	α	Botswana	Clinical	G84296	SRR1943071, SRR1947256, SRR1947259	Chen et. al 2015 Mol. Ecol.	No	No
PMHc1032.ENR	VNI	VNIc	α	Botswana	Clinical	G84297	SRR1942909, SRR1942994, SRR1944817	Chen et. al 2015 Mol. Ecol.	No	No
PMHc1034.ENR.STOR	VNI	VNIc	α	Botswana	Clinical	G84299	SRR1925890, SRR1925993, SRR1944759	Chen et. al 2015 Mol. Ecol.	No	No
PMHc1039.ENR.STOR	VNI	VNIa	α	Botswana	Clinical	G84303	SRR1943005, SRR1943018, SRR1947209	Chen et. al 2015 Mol. Ecol.	No	No
PMHc1040.ENR.STOR	VNI		α	Botswana	Clinical	G84304	SRR1942988, SRR1944842, SRR1944852	Chen et. al 2015 Mol. Ecol.	No	No
PMHc1043.ENR.STOR	VNI	VNIc	α	Botswana	Clinical	G84306	SRR1925912, SRR1925992, SRR1942982	Chen et. al 2015 Mol. Ecol.	No	No
Pr284-1	VNI	VNIb	α	Botswana	avian guano	G27160	SRX273196, SRX273197	Litvintseva et al 2011 PLoS One	No	No
Pr68	VNI	VNIb	α	S. Africa	pigeon guano	G26131	SRX256463	Litvintseva et al 2011 PLoS One	No	No
RTC1	VNI	VNIa	α	Botswana	CSF/HIV+	G27165	SRX273198	Litvintseva et al 2011 PLoS One	No	No
RTC5	VNI	VNIc	α	Botswana	CSF /HIV+	G27168	SRX273204	Litvintseva et al 2011 PLoS One	No	No
TCl-11	VNI	VNIb	α	Togo	Clinical	G29901	SRX400077, SRX400078	This study	No	No
TCl-14	VNI	VNIb	α	Togo	Clinical	G29902	SRX400080, SRX400079	This study	No	No
Th206	VNI	VNIa	α	Thailand	blood/HIV+	G26020	SRX256441, SRX256525	Litvintseva et al 2006 Genetics	No	No
Th84	VNI	VNIa	α	Thailand	blood/HIV+	G18560	SRX189610, SRX189614, SRX189373	Litvintseva et al 2006 Genetics	No	No
Tu241-1	VNI		α	Botswana	Mopane tree	G25982	SRX255635, SRX256357	Litvintseva et al 2011 PLoS One	No	No
Tu259-1	VNI	VNIa	α	Botswana	Mopane tree	G18575	SRX189602, SRX189377, SRX189628	Litvintseva et al 2011 PLoS One	No	No
Ug2459	VNI	VNIb	α	Uganda	Clinical	G27184	SRX273265	Litvintseva et al 2006 Genetics	No	No
Ug2463	VNI	VNIa	α	Uganda	Clinical	G27146	SRX273271	Litvintseva et al 2006 Genetics	No	No
WM148	VNI	VNIb	α	Australia	Clinical	G26027	SRX255666, SRX255617	Litvintseva et al 2006 Genetics, Meyer et al 2009 Med Mycol	No	No
