# Supplementary material for: Population genomics and the evolution of virulence in the fungal pathogen Cryptococcus neoformans
Source: Genome Res. 2017 Jul;27(7):1207–19. doi: 10.1101/gr.218727.116 (PMC5495072; doi:10.1101/gr.218727.116)
Supplement: Supplemental Material [file supp_gr.218727.116_Supplemental_Table_S5.xlsx]

## Sheet: Supplemental Table S5
Supplemental Table S5. Growth in response to stress. Values are relative to the growth of H99 under the same stress.
Strain	Lineage	Fluconazole_1	Fluconazole_2	Paraquat_1	Paraquat_2	Paraquat_3	H2O2_1	LDOPA_1	LDOPA_2
Bt102	VNBI	0.147	0.557	0.669	0.198	0.703	0	0.718286	0.648643
Bt142	VNBI	0	0.029	0.965	0.584	1.233	0.551	0.0997539	0.0915671
Bt147	VNBI	0.044	0.037	0.966	1.032	1.168	0.079	0.215389	0.299832
Bt148	VNBI	0	0	0.703	0	0.968	0	0.217689	0.295004
Bt154	VNBI	0.028	0.252	0.206	0	0.002	0.548	0.180233	0.209557
Bt204	VNBI	0	0.024	0.469	0	0.363	0.641	0.362333	0.295928
Bt22	VNBI	0	0.015	0.685	0.002	0.545	0.234	0.220358	0.228904
Bt24	VNBI	0.175	0.476	1.077	0.837	1.065	0.276	0.195007	0.230953
Bt45	VNBI	0	ND	1.036	0.323	ND	0	0.105032	0.330255
Bt60	VNBI	0	0	0.989	0.658	0.923	0.003	0.262321	0.298133
Bt63	VNBI	0	0	0.955	0.807	1.032	0.36	0.149205	0.209177
Bt7	VNBI	0	0	1.006	0.928	1.121	0.65	0.275796	0.245973
Bt70	VNBI	0.022	0.109	0.996	0.916	1.264	0.068	0.176924	0.146961
Bt85	VNBI	0	0.002	0.908	0.372	1.039	0.257	0.308844	0.264681
Bt96	VNBI	0.152	0.438	0.807	0.263	0.78	0.628	0.268259	0.194218
Ftc102-1	VNBI	0	0	1.001	0.909	1.161	0.299	0.227745	0.158491
Ftc103-1	VNBI	0.059	0.226	0.915	0	0.275	0.537	0.235852	0.167123
Ftc109-1	VNBI	0	0	0.869	0.41	0.674	0.609	0.218028	0.206633
Ftc111-1	VNBI	0	0.084	0.96	0.677	1.189	0.571	0.24075	0.154313
Ftc132-1	VNBI	0	0	0.981	0.717	1.081	0.466	0.130382	0.171616
Ftc134-3	VNBI	0	0	0.957	0.672	0.465	0.541	0.179133	0.222027
Ftc137-1	VNBI	0.01	0.124	0.997	0.578	0.975	0.335	0.174635	0.151084
Ftc146-1	VNBI	0.058	0.279	0.967	0.457	0.928	0.626	0.154383	0.124384
Ftc151-1	VNBI	0.003	0.049	1.057	0.884	1.128	0.014	0.276756	0.149705
Ftc153-1	VNBI	0.004	0.189	1.014	1.056	0.754	0.387	0.121256	0.125649
Ftc158-2	VNBI	0	0	0.953	0.66	0.937	0.15	0.132131	0.211266
Ftc167-1	VNBI	0.006	0.193	0.993	0.794	0.978	0.299	0.174215	0.133246
Ftc168-1	VNBI	0.001	0.052	1	0.77	0.99	0.611	0.172596	0.159956
Ftc170-1	VNBI	0	0.012	0.909	0.222	0.95	0.211	0.222857	0.207697
Ftc173-1	VNBI	0	0.018	0.986	0.655	1.166	0.195	0.173096	0.225366
Ftc192-1	VNBI	0.025	0.196	0.981	0.952	1.067	0.491	0.222287	0.193688
Ftc195-1	VNBI	0.188	0.418	0.997	0.732	0.985	0.451	0.120836	0.177129
Ftc200-1	VNBI	0.096	0.423	1.048	0.663	1.63	0.125	0.244968	0.243054
Ftc202-1	VNBI	0.002	0.156	1.068	0.957	ND	0.454	0.24003	ND
Ftc207-1	VNBI	0.033	0	1.039	1.011	0.825	0.261	0.232843	0.141293
Ftc209-1	VNBI	0	0.325	1.027	0.682	0.865	0.413	0.192858	0.139973
Ftc209-3	VNBI	0.069	0.001	0.978	0.797	1.047	0.698	0.158721	0.173171
Ftc211-1	VNBI	0	0.007	0.991	0.69	1.084	0.507	0.192258	0.198526
Ftc214-1	VNBI	0	0.161	0.857	0.323	0.953	0.326	0.156482	0.167213
Ftc217-1	VNBI	0.007	0.105	1.014	0.956	0.595	0.297	0.164009	0.140323
Ftc222-2	VNBI	0	0.132	1.016	0.889	0.624	0.568	0.134091	0.076203
Ftc225-1	VNBI	0.003	0.141	1.011	0.746	1.215	0.104	0.229674	0.0613187
Ftc225-3	VNBI	0	0.552	0.936	0.765	1.184	0.663	0.124624	0.174175
Ftc236-1	VNBI	0.089	0.137	0.897	0.352	0.717	0	0.262761	0.190969
Ftc239-1	VNBI	0.006	0.008	0.899	0	0.506	0.292	0.221287	0.166098
Ftc239-2	VNBI	0	0.008	1.022	0.956	1.105	0.686	0.106241	0.110735
Ftc241-1	VNBI	0	0.102	0.993	0.972	1.153	0.42	0.201985	0.137909
Ftc257-1	VNBI	ND	ND	0.933	ND	1.058	0.388	0.210691	0.10956
Ftc267-1	VNBI	0.034	0.171	1.013	0.724	1.167	0.159	0.262251	0.166988
Ftc267-2	VNBI	0	0	0.989	0.525	1.062	0.621	0.174575	0.197206
Ftc321-1	VNBI	0.004	0.072	1.028	0.993	1.123	0.7	0.153743	0.150364
Ftc321-2	VNBI	0.003	0.072	0.98	0.76	1.161	0.552	0.134491	0.114213
Ftc321-3	VNBI	0.004	0.014	0.928	0.886	1.051	0.336	0.229724	0.204309
Ftc327-1	VNBI	0	0	0.947	0.218	0.859	0.389	0.310583	0.226305
Ftc555-1	VNBI	ND	ND	1.019	ND	0.939	0.526	0.21448	0.235257
Ftc555-2	VNBI	0.019	0.024	0.963	0.924	1.416	0.28	0.191968	0.111634
Gbc573-1	VNBI	0	0.251	1.005	0.995	0.971	0.027	0.18713	0.217044
LP-RSA6618	VNBI	0.002	0.024	0.868	0.193	0.8	0.524	0.245388	0.2274
LP-RSA756	VNBI	0	0.035	0.596	0.667	0.775	0.812	0.165349	0.128613
Muc364-1	VNBI	0.011	0	0.994	0.838	1.247	0.629	0.173636	0.173006
Muc367-1	VNBI	0.007	0.051	1.047	0.954	1.078	0.516	0.149995	0.183157
Muc402-1	VNBI	0	0	0.942	0.826	0.983	0.411	0.133421	0.160431
Muc416-4	VNBI	0	0.017	1.008	0.678	1.291	0.592	0.273257	0.264311
Muc418-1	VNBI	0.141	0.007	0.927	0.758	1.179	0.664	0.23875	0.182482
Muc437-1	VNBI	0	0.305	0.979	0.505	0.92	0.414	0.185061	0.168028
Muc449-1	VNBI	0	0.034	1.012	0.816	1.054	0.042	0.252085	0.201285
Muc451-1	VNBI	0	0	0.998	0.9	1.224	0.144	0.18779	0.14866
Muc457-1	VNBI	0	0	1.029	0.835	1.234	0.336	0.159681	0.137215
Muc458-2	VNBI	0.005	0	0.98	0.798	ND	0.333	0.244768	0.63063
Muc460-3	VNBI	0.013	0.128	1.131	0.894	1.245	0.616	0.1631	0.167183
Muc466-1	VNBI	0	0	0.913	0.715	1.106	0.264	0.638777	ND
Muc466-3	VNBI	0.001	0.101	0.947	0.425	1.16	0.714	0.23964	0.167078
Muc479-1	VNBI	0.007	0.134	0.961	0.801	1.122	0.765	0.198386	0.155647
Muc489-1	VNBI	0	0	1.005	0.941	1.064	0.141	0.129243	0.178968
Muc498-2	VNBI	0	0	1.028	0.72	1.053	0.457	0.273817	0.217449
Muc503-1	VNBI	0.021	0.079	1.012	0.721	1.123	0.551	0.150344	0.161245
Muc504-1	VNBI	0	0	1.019	0.766	0.5	0	0.26501	0.146531
Muc516-1	VNBI	0	0.03	1.019	0.767	1.231	0.484	0.174665	0.196847
Muc525-1	VNBI	0	0.018	1.005	0.853	1.054	0.693	0.229064	0.194897
NRHc5004.ENR	VNBI	0.448	0.712	1.012	0.814	0.39	0.303	0.207612	0.163135
NRHc5005.ENR	VNBI	0	0.052	0.975	0.945	0.845	0.007	0.204864	0.216699
NRHc5009.ENR	VNBI	0.119	0.121	0.627	0	0	0.13	0.218678	0.208052
NRHc5009.REL.INI	VNBI	0.087	0.146	0.609	0	0.066	0.085	0.246068	0.339197
NRHc5011.ENR	VNBI	0.088	0.432	0	0	0.001	0.16	0.263501	0.177934
NRHc5013.ENR	VNBI	0.002	0.014	0.952	0.69	0.992	0.443	0.155423	0.307489
NRHc5013.REL.INI	VNBI	0	0.042	0.978	0.33	1.204	0.237	0.115658	0.102818
NRHc5019.ENR	VNBI	0	0.014	1.007	0.872	1.053	0.548	0.42288	0.260267
NRHc5020.ENR	VNBI	0.001	0.114	0.999	0.918	1.424	0.313	0.183842	0.180873
NRHc5021.ENR	VNBI	0.001	0.065	0.847	0.743	0.801	0.36	0.168188	0.120426
NRHc5022.ENR	VNBI	0	0.001	0.965	0.81	0.882	0.03	0.165379	0.190074
NRHc5023.ENR	VNBI	0.287	0.552	0.987	0.848	1.033	0.028	0.234292	0.277715
NRHc5024.ENR.CLIN.1	VNBI	0.334	0.711	0.742	0.463	0.792	0	0.210421	0.202295
NRHc5024A.ENR.CLIN.ISO	VNBI	0.489	0.749	0.773	0.508	0.761	0	0.193578	0.196182
NRHc5026.ENR.CLIN.ISO	VNBI	0	0.019	0.992	0.709	0.995	0.109	0.236311	0.218403
NRHc5027.ENR.CLIN1	VNBI	0	0	0.928	0.568	0.898	0.099	0.279815	0.215624
NRHc5029.ENR.CLIN.ISO	VNBI	0.114	0.487	0.992	0.702	1.108	0.445	0.16127	0.207902
NRHc5030.ENR.CLIN.ISO	VNBI	0.264	0.738	0.975	0.209	0.82	0	0.284373	0.180378
NRHc5032.ENR.CLIN.ISO	VNBI	0.137	0.306	0.546	0	0.16	0.715	0.227615	0.300317
NRHc5035.ENR.CLIN.ISO	VNBI	0.135	0	0.774	0.024	0.573	0.758	0.157682	0.157512
NRHc5037.ENR.CLIN1	VNBI	0	0.016	0.995	0.925	1.015	0.602	0.21528	0.20221
NRHc5039.ENR.STOR	VNBI	0.013	0.144	0.855	0	0.463	0.249	0.175295	0.219343
NRHc5040.ENR.CLIN.ISO	VNBI	0	0	0.436	0.038	0.401	0.004	0.26482	0.177369
NRHc5041.ENR.STOR	VNBI	0	0.111	0.093	0	0	0.444	0.169647	0.222142
NRHc5042.ENR.STOR	VNBI	0	0.436	1.125	0.041	1.008	0.133	0.360794	0.343905
NRHc5045.ENR.CLIN.ISO	VNBI	0	0.004	0.919	0.897	1.252	0	0.112229	0.111519
PLR10	VNBI	0	0	0.971	0.589	0.822	0.496	0.215309	0.232153
PMHc1001.ENR	VNBI	0	0.942	1.135	0	1.039	0	0.468172	0.259328
PMHc1011.ENR	VNBI	0.001	0.057	0.951	0.632	0.963	0.5	0.248927	0.273107
PMHc1014.ENR	VNBI	0	0	0.983	0.679	1.019	0.556	0.228774	0.247217
PMHc1026.ENR	VNBI	0	0	0.68	0	0.107	0.072	0.256364	0.194123
PMHc1030.ENR.CLIN.ISO	VNBI	0.473	0.814	0.878	0.737	0.974	0.341	0.191229	0.162495
PMHc1038.ENR.CLIN1	VNBI	0.187	0.957	0.988	1.002	1.174	0.354	0.159671	0.127233
PMHc1050.ENR.CLIN1	VNBI	0.308	0.66	0.934	0.748	0.865	0.011	0.181752	0.102968
RTC3	VNBI	0	0.029	0.772	0.281	0.703	0.469	0.201775	0.300327
Tu229-1	VNBI	0.354	0.597	0.973	0.61	1.057	0.675	0.26507	0.179128
Tu360-1	VNBI	0.088	0.243	0.859	0.169	0.452	0.451	0.201995	0.145316
Tu369-1	VNBI	0	0.054	0.993	0.784	1.297	0.647	0.1881	0.153433
Tu401_1	VNBI	0.026	0.215	ND	0.848	1.151	ND	0.569683	0.0668766
Tu406-1	VNBI	0	0.004	1.038	0.642	1.278	0.523	0.200165	0.118602
Tu416-1	VNBI	0.104	0.296	1.016	0.259	0.963	0.227	0.251206	0.150669
Tu422-1	VNBI	0	0.011	1.043	0.836	1.204	0.918	0.169767	0.170737
Bt1	VNBII	0.191	0.524	0.665	0.08	0.588	0	0.124574	0.165938
Bt10	VNBII	0	0	0.904	0.832	0.9	0.069	0.283243	0.337722
Bt103	VNBII	0	0	1.059	0.947	1.18	0.184	0.729662	0.796746
Bt105	VNBII	0.041	0.295	1.013	0.874	1.105	0.203	0.229214	0.176255
Bt109	VNBII	0.002	0.001	0.381	0	0	0.003	0.270948	0.514869
Bt115	VNBII	0	0	0.903	0.493	0.496	0	0.328666	0.22812
Bt133	VNBII	0	0.045	0.313	0	0.037	0.621	0.34508	0.398429
Bt136	VNBII	0.371	0.678	1.029	0.9	1.244	0.053	0.276706	0.146596
Bt143	VNBII	0.004	0.05	0.581	0	0.36	0.087	0.29324	0.170797
Bt146	VNBII	0.026	0.013	0.893	0.845	0.425	0.096	0.585497	0.722954
Bt149	VNBII	0	0	0.2	0	0.033	0.491	0.626801	0.596118
Bt152	VNBII	0.052	0.199	0.602	0.007	0.091	0.032	0.340092	0.378397
Bt157	VNBII	0	0	1.048	1.043	1.095	0.092	0.180753	0.188935
Bt206	VNBII	0.014	0.061	1.02	0.304	0.636	0	0.196937	0.270183
Bt208	VNBII	0.008	0.119	0.977	0.817	1.035	0.145	0.209302	0.275111
Bt25	VNBII	0	0.029	0.99	0.857	1.191	0.053	0.269599	0.260512
Bt27	VNBII	0	0	0.712	0.064	0.633	0.387	0.361143	0.273552
Bt31	VNBII	0.002	0.046	0.99	0.896	0.977	0	0.554189	0.719186
Bt32	VNBII	0	0	1.054	0.922	0.954	0	0.304005	0.550845
Bt33	VNBII	0.473	0.286	0.926	0.974	0.783	0	0.247307	0.262057
Bt34	VNBII	0	0.331	0.624	0	0.841	0	0.345389	0.393181
Bt35	VNBII	0.019	0.149	0.882	0.454	0.594	0	0.298917	0.321899
Bt38	VNBII	0.301	0.612	0.998	0.994	1.103	0.45	0.228774	0.381056
Bt39	VNBII	0.283	0.678	0.981	0.829	1.175	0.076	0.24059	0.237891
Bt40	VNBII	0	0.2	0.944	0.756	0.817	0.334	0.251066	0.264576
Bt41	VNBII	0.119	0.298	0.932	0.822	0.529	0	0.312752	0.264201
Bt46	VNBII	0	0	0.746	0	0.351	0	0.260632	0.218703
Bt5	VNBII	0	0.009	0.168	0	0	0.018	0.324188	0.362963
Bt52	VNBII	0.001	0.053	0.947	0.684	0.857	0.498	0.206373	0.246727
Bt53	VNBII	0	0	0	0	0	0	0.425899	0.250816
Bt54	VNBII	0.235	0.546	0.915	0.748	0.936	0	0.277386	0.173616
Bt55	VNBII	0	0	0.472	0	0	0	0.241469	0.391987
Bt56	VNBII	0	0.013	0.327	0	0.176	0	0.184761	0.131352
Bt65	VNBII	0.637	0.729	0.514	0.261	0.317	0	0.129283	0.193308
Bt75	VNBII	0.186	0.371	0.348	0	0	0	0.699293	0.559037
Bt76	VNBII	0	0	1.072	1.049	1.08	0	0.255484	0.180853
Bt81	VNBII	0.156	0.828	0.31	0	0.288	0.345	0.294869	0.229914
Bt84	VNBII	0	0	0.88	0.009	0.588	0.373	0.418321	0.389812
Bt88	VNBII	0	0.004	0.72	0.555	0.372	0.153	0.164289	0.219383
Bt89	VNBII	0.621	0.985	0.777	0	0.231	0.627	0.277496	0.26576
Bt98	VNBII	0	0	0.827	0.087	0.682	0.22	0.197386	0.223306
LP-RSA3144	VNBII	0	0.711	0.627	0	0.06	0.189	0.313372	0.214595
Muc387-1	VNBII	0	0.05	0.878	0.307	0.61	0.209	0.144097	0.169322
Muc387-2	VNBII	0	0.013	0.801	0.101	0.35	0.25	0.295099	0.264541
MW-RSA1186	VNBII	0.003	0.267	0.984	0.702	0.744	0.482	0.236471	0.190279
MW-RSA1607	VNBII	0.56	0.046	0.657	0.164	0.586	0	0.24096	0.287957
MW-RSA2967	VNBII	0.639	0.004	0	0	0	0	0.178334	0.219853
MW-RSA3179	VNBII	0.941	1.281	0.976	0.562	0.342	0.341	0.224586	0.382685
MW-RSA3321	VNBII	0	1.013	0.953	0.047	0.378	0.461	0.16313	0.260212
MW-RSA913	VNBII	0.001	0	0.766	0	0.282	0	0.166468	0.225281
NRHc5008.ENR	VNBII	0	0.047	0.951	0	1.086	0.001	0.248567	0.168647
NRHc5014.ENR	VNBII	0	0.128	0.697	0.105	0.704	0.59	0.21418	0.150804
NRHc5031.ENR.CLIN.ISO	VNBII	0.012	0.115	0.763	0	0.236	0.033	0.233293	0.206368
PMHc1002.ENR	VNBII	0	0.242	0.833	0	0.181	0.375	0.18883	0.219118
PMHc1009.ENR	VNBII	0.175	0.417	0.969	0.741	1.063	0.283	0.146756	0.153403
PMHc1024.ENR	VNBII	0	0.129	0.722	0	0.249	0.373	0.748474	0.612037
PMHc1029.ENR.STOR	VNBII	0	0	0.092	0	0	0	0.201965	0.323003
PMHc1033.ENR	VNBII	0.322	0.764	0.852	0.763	1.192	0.004	0.172956	0.110355
PMHc1035.ENR.STOR	VNBII	0	0	0.53	0	0.327	0.059	0.357355	0.456762
PMHc1047.ENR.CLIN1	VNBII	0.053	1.005	0.583	0	0.573	0.042	0.806522	0.243749
PMHc1049.THER1.STOR	VNBII	0.009	0.128	0.989	0.472	0.637	0	0.250926	0.136355
PMHc1052.ENR.STOR	VNBII	0.132	0.389	0.897	0.803	1.069	0.384	0.227765	0.295804
Ze90_1	VNBII	0	0.008	0.158	0	0.018	0.04	0.247757	0.258538
A1-35-8	VNI control	0.023	0.11	1.048	0.707	0.973	0.372	0.237151	0.208522
Cna1	VNI control	0.307	0.846	0.897	0.916	1.158	0.533	0.264521	0.223002
H99	VNI control	0.021	0.017	0.853	0	0.749	0	0.173616	0.21328
Hog1	VNI control	0.473	0.495	0.816	0.913	0.923	0	0.183492	0.151069
Lac1	VNI control	0.015	0.011	0.396	0	0.002	0.022	0.730042	0.647093
Mpk1	VNI control	0	0	0.726	0.646	0.525	0	0.282214	0.216574
Ras1	VNI control	0.206	0.815	0.526	0	0.466	0.205	0.204983	0.20096
